# Supplementary material for: Community-based interventions targeting multiple forms of malnutrition among adolescents in low-income and middle-income countries: protocol for a scoping review
Source: PubMed Central journal article supplement (PMC10982731; doi:10.1136/bmjopen-2023-078969), 2024-03-28
Supplement: bmjopen-2023-078969.draft_revisions.pdf [file bmjopen-2023-078969.draft_revisions.pdf]

# BMJ Open

BMJ Open is committed to open peer review. As part of this commitment we make the peer review history of every article we publish publicly available.

When an article is published we post the peer reviewers' comments and the authors' responses online. We also post the versions of the paper that were used during peer review. These are the versions that the peer review comments apply to.

The versions of the paper that follow are the versions that were submitted during the peer review process. They are not the versions of record or the final published versions. They should not be cited or distributed as the published version of this manuscript.

BMJ Open is an open access journal and the full, final, typeset and author-corrected version of record of the manuscript is available on our site with no access controls, subscription charges or pay-per-view fees (<http://bmjopen.bmj.com>).

If you have any questions on BMJ Open's open peer review process please email [info.bmjopen@bmj.com](mailto:info.bmjopen@bmj.com)

# BMJ Open

## Community-based interventions targeting multiple forms of malnutrition among adolescents in low- and middle-income countries: protocol for a scoping review

|                               |                                                                                                                                                                                                                                                                                                                                                                                                                                                                                                                                                                                                                                                                                                                                                                                                                                                                                                                                                                                                                                                                                                                                                                                                                                                                                                                                                                                                                                                                                                                                                                |
|-------------------------------|----------------------------------------------------------------------------------------------------------------------------------------------------------------------------------------------------------------------------------------------------------------------------------------------------------------------------------------------------------------------------------------------------------------------------------------------------------------------------------------------------------------------------------------------------------------------------------------------------------------------------------------------------------------------------------------------------------------------------------------------------------------------------------------------------------------------------------------------------------------------------------------------------------------------------------------------------------------------------------------------------------------------------------------------------------------------------------------------------------------------------------------------------------------------------------------------------------------------------------------------------------------------------------------------------------------------------------------------------------------------------------------------------------------------------------------------------------------------------------------------------------------------------------------------------------------|
| Journal:                      | <i>BMJ Open</i>                                                                                                                                                                                                                                                                                                                                                                                                                                                                                                                                                                                                                                                                                                                                                                                                                                                                                                                                                                                                                                                                                                                                                                                                                                                                                                                                                                                                                                                                                                                                                |
| Manuscript ID                 | bmjopen-2023-078969                                                                                                                                                                                                                                                                                                                                                                                                                                                                                                                                                                                                                                                                                                                                                                                                                                                                                                                                                                                                                                                                                                                                                                                                                                                                                                                                                                                                                                                                                                                                            |
| Article Type:                 | Protocol                                                                                                                                                                                                                                                                                                                                                                                                                                                                                                                                                                                                                                                                                                                                                                                                                                                                                                                                                                                                                                                                                                                                                                                                                                                                                                                                                                                                                                                                                                                                                       |
| Date Submitted by the Author: | 17-Aug-2023                                                                                                                                                                                                                                                                                                                                                                                                                                                                                                                                                                                                                                                                                                                                                                                                                                                                                                                                                                                                                                                                                                                                                                                                                                                                                                                                                                                                                                                                                                                                                    |
| Complete List of Authors:     | <p>Kurniawan, Adi Lukas; Heidelberg University, Heidelberg Institute of Global Health<br/>         Ranisavljev, Marijana; University of Novi Sad, Faculty of Sport and Physical Education<br/>         Partap, Uttara; Harvard University T H Chan School of Public Health, Department of Global Health and Population<br/>         Shinde, Sachin ; Harvard University T H Chan School of Public Health, Department of Global Health and Population; Central for Inquiry into Mental Health<br/>         Ostojic, Sergej; University of Novi Sad, Faculty of Medicine; University of Agder, Department of Nutrition and Public Health<br/>         Mkwanazi, Ntombizodumo; University of KwaZulu-Natal, Research Division<br/>         Alangea, Deda Ogum; University of Ghana, Department of Population, Family, and Reproductive Health<br/>         Neumann, Christine; Heidelberg University, Heidelberg Institute of Global Health<br/>         Liu, Shuyan; Charité Universitätsmedizin Berlin, Department of Psychiatry and Psychotherapy<br/>         Bärnighausen, Till ; Heidelberg University, Heidelberg Institute of Global Health; Africa Health Research Institute<br/>         Fawzi, Wafaie.; Harvard University T H Chan School of Public Health, Department of Global Health and Population; Harvard University T H Chan School of Public Health, Department of Nutrition<br/>         Collaborators, ARISE-NUTRINT; Heidelberg University, Heidelberg Institute of Global Health; Harvard University T H Chan School of Public Health</p> |
| Keywords:                     | Adolescent, NUTRITION & DIETETICS, Health Education, Systematic Review, Anaemia < HAEMATOLOGY                                                                                                                                                                                                                                                                                                                                                                                                                                                                                                                                                                                                                                                                                                                                                                                                                                                                                                                                                                                                                                                                                                                                                                                                                                                                                                                                                                                                                                                                  |
|                               |                                                                                                                                                                                                                                                                                                                                                                                                                                                                                                                                                                                                                                                                                                                                                                                                                                                                                                                                                                                                                                                                                                                                                                                                                                                                                                                                                                                                                                                                                                                                                                |

SCHOLARONE™  
Manuscripts

1  
2  
3 **1 Community-based interventions targeting multiple forms of malnutrition among adolescents**  
4  
5 **2 in low- and middle-income countries: protocol for a scoping review**  
6

7 3 Adi Lukas Kurniawan <sup>1</sup>, Marijana Ranisavljev <sup>2</sup>, Uttara Partap <sup>3</sup>, Sachin Shinde <sup>3,4,\*</sup>, Sergej Ostojic <sup>5,6</sup>,  
8  
9 4 Ntombizodumo Mkwanzazi <sup>7</sup>, Deda Ogum Alangea <sup>8</sup>, Christine Neumann <sup>1</sup>, Shuyan Liu <sup>9</sup>, Till Bärnighausen  
10  
11 5 <sup>1,10</sup>, Wafaie W Fawzi <sup>3,11,12</sup>, ARISE-NUTRINT collaborators <sup>13</sup>.  
12  
13

14 6  
15  
16 7 <sup>1</sup>Heidelberg Institute of Global Health, Heidelberg University Hospital, Heidelberg, Germany. Email:  
17  
18 8 [lukas.kurniawan@uni-heidelberg.de](mailto:lukas.kurniawan@uni-heidelberg.de) (ALK); [till.baernighausen@uni-heidelberg.de](mailto:till.baernighausen@uni-heidelberg.de) (TB);  
19  
20 9 [christine.neumann@uni-heidelberg.de](mailto:christine.neumann@uni-heidelberg.de) (CN)  
21

22 10 <sup>2</sup>Faculty of Sport and Physical Education, University of Novi Sad, Vojvodina, Serbia. Email:  
23  
24 11 [marijanaranisavljev@gmail.com](mailto:marijanaranisavljev@gmail.com) (MR)  
25

26 12 <sup>3</sup>Department of Global Health and Population, Harvard T. H. Chan School of Public Health, Boston,  
27  
28 13 Massachusetts, USA. Email: [mina@hsph.harvard.edu](mailto:mina@hsph.harvard.edu) (WWF); [upartap@hsph.harvard.edu](mailto:upartap@hsph.harvard.edu) (UP)  
29

30 14 <sup>4</sup>Center for Inquiry into Mental Health, Pune, Maharashtra, India.  
31

32 15 <sup>5</sup>Faculty of Medicine, University of Novi Sad, Novi Sad, Serbia. Email: [sergej.ostojic@chess.edu.rs](mailto:sergej.ostojic@chess.edu.rs) (SO)  
33

34 16 <sup>6</sup>Department of Nutrition and Public Health, University of Agder, Kristiansand, Norway.  
35

36  
37 17 <sup>7</sup>Research Division, University of KwaZulu-Natal, Durban, South Africa. Email:  
38  
39 18 [MkwanzaziN2@ukzn.ac.za](mailto:MkwanzaziN2@ukzn.ac.za) (NM)  
40

41 19 <sup>8</sup>Department of Population, Family, and Reproductive Health, School of Public Health, University of  
42  
43 20 Ghana, Accra, Ghana. Email: [DOgumAlangea@ug.edu.gh](mailto:DOgumAlangea@ug.edu.gh) (DOA)  
44

45 21 <sup>9</sup>Department of Psychiatry and Neurosciences, Charité Berlin University Medicine, Berlin, Germany.  
46  
47 22 Email: [shuyan.liu@charite.de](mailto:shuyan.liu@charite.de) (SL)  
48

49 23 <sup>10</sup>Africa Health Research Institute, Durban, South Africa.  
50

51 24 <sup>11</sup>Department of Epidemiology, Harvard T. H. Chan School of Public Health, Boston, Massachusetts, USA.  
52

53 25 <sup>12</sup>Department of Nutrition, Harvard T. H. Chan School of Public Health, Boston, Massachusetts, USA.  
54

55  
56 26 <sup>13</sup>ARISE-NUTRINT collaborators:  
57  
58  
59  
60

- 1  
2  
3 27 Michael Laxy, Professorship of Public Health and Prevention, Technical University of Munich, Germany.  
4  
5 28 Jacob Burns, Professorship of Public Health and Prevention, Technical University of Munich, Germany.  
6  
7 29 Sara Pedron, Professorship of Public Health and Prevention, Technical University of Munich, Germany.  
8  
9 30 Mary Mwanyika Sando, Africa Academy for Public Health, Tanzania.  
10  
11 31 Ayoade Oduola, University of Ibadan Research Foundation, Nigeria.  
12  
13 32 Mosa Moshabela, University of KwaZulu-Natal, South Africa.  
14  
15 33 Ali Sié, National Institute of Public Health, Nouna Health Research Center, Burkina Faso.  
16  
17 34 David Guwatudde, School of Public Health, Makerere University, Uganda.  
18  
19 35 Yemane Berhane, Addis Continental Institute of Public Health, Ethiopia.  
20  
21 36 Adom Manu, Department of Population, Family, and Reproductive Health, University of Ghana, Ghana.  
22  
23 37 Jan A.C. Hontelez, Erasmus Universitair Medisch Centrum, The Netherlands.  
24  
25 38 Magda Rosenmöller, Center for Research in Healthcare Innovation Management, IESE Business School,  
26  
27 Spain.  
28  
29 39 Irene Brandt, Heidelberg Institute of Global Health, Heidelberg University Hospital, Germany.  
30  
31 40 Ina Danquah, Heidelberg Institute of Global Health, Heidelberg University Hospital, Germany.  
32  
33 41 Matthias Kern, Heidelberg Institute of Global Health, Heidelberg University Hospital, Germany.  
34  
35 42 Joy Mauti, Heidelberg Institute of Global Health, Heidelberg University Hospital, Germany.  
36  
37 43 Shannon McMahon, Heidelberg Institute of Global Health, Heidelberg University Hospital, Germany.  
38  
39 44 Japhet Killewo, Muhimbili University of Health and Allied Sciences, Tanzania.  
40  
41 45 Hanna Y. Berhane, Department of Nutrition and Behavioral Sciences, Addis Continental Institute of Public  
42  
43 Health, Ethiopia.  
44  
45 46 Amani Tinkasimile, Africa Academy for Public Health, Tanzania.  
46  
47 47 Mashavu Yussuf, Africa Academy for Public Health, Tanzania.  
48  
49 48 Innocent Yusufu, Africa Academy for Public Health, Tanzania.  
50  
51 49 Laetitia Paumard, Center for Research in Healthcare Innovation Management, IESE Business School,  
52  
53 Spain.  
54  
55  
56  
57  
58  
59  
60

- 1  
2  
3 53 Millogo Ourohiré, National Institute of Public Health, Nouna Health Research Center, Burkina Faso.  
4  
5 54 Erick Agure, Heidelberg Institute of Global Health, Heidelberg University Hospital, Germany.  
6  
7 55 Jabulani Ncayiyana, College of Health Sciences, University of KwaZulu-Natal, South Africa.  
8  
9 56 Bruno Sunguya, School of Public Health and Social Sciences, Muhimbili University of Health and Allied  
10  
11 57 Sciences, Tanzania.  
12  
13 58 Tiwatayo Lasebikan, Center for Research in Healthcare Innovation Management, IESE Business School,  
14  
15 59 Spain.  
16  
17 60 Marina Taonda, National Institute of Public Health, Nouna Health Research Center, Burkina Faso.  
18  
19 61 Sylvain Somé, National Institute of Public Health, Nouna Health Research Center, Burkina Faso.  
20  
21 62 Clarisse Dah, National Institute of Public Health, Nouna Health Research Center, Burkina Faso.  
22  
23 63 Katian Napon, National Institute of Public Health, Nouna Health Research Center, Burkina Faso.  
24  
25 64 Moussa Ouédraogo, National Institute of Public Health, Nouna Health Research Center, Burkina Faso.  
26  
27 65 Elisabetta Ferrero, Department of Global Health and Population, Harvard T. H. Chan School of Public  
28  
29 66 Health, USA.  
30  
31  
32  
33  
34  
35 68 \*Correspondence: Sachin Shinde, Department of Global Health and Population, Harvard T.H. Chan School  
36  
37 69 of Public Health, 3<sup>rd</sup> Floor, 90 Smith St. Boston, MA 02120, USA. Email: [sshinde@hsph.harvard.edu](mailto:sshinde@hsph.harvard.edu)  
38  
39  
40

41 **Word count:** 3010 (not including title page, abstract, references, tables, or acknowledgement)  
42  
43  
44  
45  
46  
47  
48  
49  
50  
51  
52  
53  
54  
55  
56  
57  
58  
59  
60

## 73 Abstract

74 **Background:** Adolescent malnutrition is a significant public health challenge in low- and middle-income  
75 countries (LMICs), with long-term consequences for health and development. Community-based  
76 interventions have the potential to address multiple forms of malnutrition and improve the health outcomes  
77 of adolescents. However, there is a lack of comprehensive understanding regarding such interventions'  
78 content, implementation, and effectiveness. This scoping review aims to synthesize evidence on  
79 community-based interventions targeting multiple forms of malnutrition among adolescents in LMICs and  
80 describe their effects on nutrition and health.

81 **Methods and analysis:** A comprehensive search strategy will be implemented in multiple databases  
82 including MEDLINE (through PubMed), Embase, and CENTRAL (through Cochrane Library), covering  
83 the period from January 1, 2000, to July 14, 2023. The inclusion criteria encompass randomized controlled  
84 trials and quasi-experimental studies focusing on adolescents aged 10-19 years. Various types of  
85 interventions, such as micronutrient supplementation, nutrition education, feeding interventions, physical  
86 activity, and community environment interventions, will be considered. Two reviewers will perform data  
87 extraction independently, and, where relevant, risk of bias assessment will be conducted using standard  
88 Cochrane risk-of-bias tools. The findings will be synthesized and presented using the Synthesis Without  
89 Meta-analysis (SWiM) guidelines for scoping reviews.

90 **Ethics and dissemination:** The scope of this scoping review is restricted to publicly accessible databases  
91 that do not require prior ethical approval for access. The findings of this review will be shared through  
92 publications in peer-reviewed journals, and presentations at international and regional conferences and  
93 stakeholder meetings in LMICs.

94 **Scoping review registration:** The final protocol was registered prospectively with the Open Science  
95 Framework on July 19, 2023 (<https://osf.io/t2d78>).

1  
2  
3 99 **Article Summary**  
4

5 100 Strengths and limitations of this study  
6

- 7 101 • This scoping review will clearly describe the available evidence on community-based interventions  
8 that address the multiple forms of malnutrition among adolescents in LMICs.  
9 102  
10 103 • Grey literature sources such as government reports and organization websites will be also included.  
11  
12 104 • Alongside consideration of the characteristics of documented interventions, we will also consider  
13  
14 105 measures of impact.  
15  
16 106 • Where measures of impact are available, there will be a quality assessment of the included studies.  
17  
18 107 • The proposed search strategy will be conducted only in three electronic databases.  
19  
20  
21  
22  
23  
24  
25  
26  
27  
28  
29  
30  
31  
32  
33  
34  
35  
36  
37  
38  
39  
40  
41  
42  
43  
44  
45  
46  
47  
48  
49  
50  
51  
52  
53  
54  
55  
56  
57  
58  
59  
60

## 108 **Introduction**

109 The current global adolescent population surpasses 1.2 billion individuals, with approximately 90 percent  
110 of them residing in low- and middle-income countries (LMICs) (1). Moreover, when considering regional  
111 trends, it is expected that the proportion of young people aged 10 to 24 residing in Sub-Saharan Africa will  
112 experience substantial growth, rising from 245 million in 2015 to 605 million by 2050 (2). In contrast, the  
113 Asia and Pacific region is expected to undergo the most significant decrease, declining from 718 million in  
114 2015 to 619 million by 2050 (2). These regional variations emphasize the unique challenges and  
115 opportunities faced by different regions in terms of future demographic and health challenges, which will  
116 require distinct solutions.

117  
118 Adolescence is a period of rapid physical growth, cognitive development, socio-emotional development,  
119 and cultural development, all of which are strongly influenced by an individual's socioeconomic, cultural,  
120 and physical environments (3). Nutrition plays a crucial role in improving health and development during  
121 this critical stage in life, bringing intergenerational benefits. After the first 1000 days of life, adolescence  
122 is assumed to offer a second opportunity for correcting nutritional deficiencies and insufficient growth since  
123 childhood (4).

124  
125 Low- and middle-income countries (LMICs) are experiencing a rapid nutrition transition among  
126 adolescents, accompanied on the one hand by stunting, thinness, anemia, and other micronutrient  
127 deficiencies, and on the other hand by an increasing burden of obesity and non-communicable diseases (5).  
128 Malnutrition was the leading cause of disability-adjusted life years (DALYs) among the 10-14 age group  
129 in 2019, followed by iron deficiency anemia among adolescents aged 10-19 (6). The consumption of diverse  
130 and healthy diets by adolescents from LMICs is declining, while the consumption of processed and calorie-  
131 rich foods is on the rise, contributing to rising obesity rates (7). Furthermore, food insecurity has been  
132 aggravated in vulnerable populations including adolescents in LMICs because of the COVID-19 pandemic,  
133 political instability, and recurring climate crises in the form of flooding and droughts.



1  
2  
3 134 Several systematic reviews indicate that micronutrient supplementation is effective in addressing nutritional  
4  
5 135 deficiencies (8). Iron supplementation can reduce anemia in adolescents; periconceptional folic acid  
6  
7 136 supplementation among adolescent girls can reduce neural tube defects; and adolescent girls who consume  
8  
9 137 high amounts of calcium ( $\geq 1$  g daily) have lower rates of preeclampsia, preterm birth, or neonatal  
10  
11 138 hospitalization (9). There is limited evidence that protein-energy supplements are effective for adolescents.

12  
13  
14 139  
15  
16 140 The burden of malnutrition may be reduced by several nutrition-sensitive interventions, including nutrition  
17  
18 141 education, dietary interventions, physical activity, and food environment interventions (10). Several  
19  
20 142 systematic reviews suggest promising but modest results from discrete nutrition-sensitive interventions  
21  
22 143 aimed at addressing malnutrition in schools (11-13). These single-domain interventions, however, target  
23  
24 144 either undernutrition or overnutrition and operate in *silos*. There is increased interest in addressing health  
25  
26 145 and nutrition behaviors through integrated interventions, generally called "double-duty actions", targeting  
27  
28 146 multiple forms of malnutrition and nutrition-related non-communicable diseases (14). An essential element  
29  
30 147 of this concept is that tackling one form of malnutrition should not prevent addressing another. There is  
31  
32 148 promising evidence that integrated interventions can improve the nutritional status of school-going children  
33  
34 149 and adolescents (10).

35  
36  
37 150  
38  
39 151 Nevertheless, there are several gaps in understanding adolescent nutrition in LMICs. Currently, nutrition-  
40  
41 152 specific, and nutrition-sensitive interventions tend to focus on school-going adolescents, and little is known  
42  
43 153 about their effects on other vulnerable groups of adolescents, such as out-of-school adolescents, migrant  
44  
45 154 adolescents, and HIV-positive adolescents. Another important gap is that most of the school-based  
46  
47 155 interventions target overlapping age groups and there is little known regarding the age-appropriate  
48  
49 156 intervention strategies and delivery mechanisms as well as the specific impact on the adolescent population.  
50  
51 157 Moreover, most of these school-based interventions are delivered by schoolteachers, community health  
52  
53 158 workers, school nurses, or peers in classroom-based settings or during school hours. Despite the importance  
54  
55 159 of nutrition-sensitive and nutrition-specific interventions for the health of communities, little evidence

1  
2  
3 160 exists about their form and function using community platforms. Therefore, the purpose of this scoping  
4  
5 161 review is to comprehensively review the literature to describe community-based interventions that address  
6  
7 162 the multiple forms of malnutrition such as obese, overweight, underweight, wasting, stunting, anemia, and  
8  
9 163 micronutrient deficiencies affecting adolescents in LMICs and describe the effects of these interventions  
10  
11 164 on nutrition and health.

12 165

## 16 166 **Methods**

### 18 167 **Data sources, search terms and search strategy**

20 168 We will search MEDLINE (through PubMed), Embase, and CENTRAL (through the Cochrane Library).  
21  
22 169 All databases will be searched for eligible studies from January 1, 2000, through July 14, 2023. We will  
23  
24 170 identify potentially relevant published studies using the combination of medical subject headings (MeSH)  
25  
26 171 and text words denoting nutrition-specific and nutrition-sensitive interventions. We will also examine  
27  
28 172 references and bibliographies of included studies to identify additional sources of information. This search  
29  
30 173 of studies will be supplemented by reviewing ClinicalTrials.gov and organizational websites such as the  
31  
32 174 World Health Organization (WHO), World Bank, United Nations Children's Fund (UNICEF), and United  
33  
34 175 Nations Population Fund (UNFPA). When possible, reports written in languages other than English will be  
35  
36 176 translated by colleagues who are native speakers of those languages. No study will be considered if it cannot  
37  
38 177 be adequately translated.

40 178

43 179 We will use the PICO model (Table 1) to guide our search strategy, but we will not be restricted by outcomes  
44  
45 180 to maintain a broad search. The search will use indexing terms, including MeSH terms, keywords, and free  
46  
47 181 text words. First, a broad search strategy (e.g., type of study [randomized controlled trials, quasi-  
48  
49 182 experiments, or controlled before-after studies] AND intervention domain [e.g., nutrition education] AND  
50  
51 183 population [adolescents] AND setting [low- and middle-income countries]) will be performed in PubMed.  
52  
53 184 We will confirm the sensitivity of the search strategy by identifying several sentinel articles. The PubMed  
54  
55 185 strategy, provided in **Supplementary File 1**, will be adapted to suit other databases. We will document the

186 following details for each search: databases searched, date of search, search strategy (i.e., subject headings  
 187 and keywords, including if terms are expanded, truncated, and how they are combined), filters used, and  
 188 the number of records retrieved. Additionally, a source will be provided for each publication identified  
 189 through manual search (i.e., journal name, website, conference proceedings, etc.).

190

191 **Table 1 Eligibility criteria for the systematic review in PICO format**

| Item                                                | Inclusion criteria                                                                                                                                                                                                                                                                                                                                                                                                                                                                                         | Exclusion criteria                                                                                                                                        |
|-----------------------------------------------------|------------------------------------------------------------------------------------------------------------------------------------------------------------------------------------------------------------------------------------------------------------------------------------------------------------------------------------------------------------------------------------------------------------------------------------------------------------------------------------------------------------|-----------------------------------------------------------------------------------------------------------------------------------------------------------|
| Population                                          | Studies involving adolescents (10–19 years old) in the community setting in low- and middle-income countries                                                                                                                                                                                                                                                                                                                                                                                               | Studies involving adolescents (10–19 years old) but interventions applied exclusively in the school setting                                               |
| Interventions, approaches or exposures of interests | Studies involving one or more of the following interventions: nutrient supplementation interventions including vitamin and nutrient supplementation, deworming, complementary feeding, nutrition education, physical education, promoting healthy diets and/or physical activity, nutrition policies, community/home garden, water, sanitation and hygiene interventions, community environment interventions, and structural interventions such as sweetened beverage tax, soda tax, and sugary drink tax | Interventions targeted towards individuals with specific medical conditions such as treatments intended for underweight, overweight, or obese adolescents |

|            |                                                                                                                                                                                                                                                                                                                                                                                                                                                                                                                                                                                                 |                |
|------------|-------------------------------------------------------------------------------------------------------------------------------------------------------------------------------------------------------------------------------------------------------------------------------------------------------------------------------------------------------------------------------------------------------------------------------------------------------------------------------------------------------------------------------------------------------------------------------------------------|----------------|
| Comparison | Studies that compared the intervention with any relevant control group including comparisons with no intervention, regular nutrition education and/or physical education, or any other intervention in the community setting                                                                                                                                                                                                                                                                                                                                                                    | Not applicable |
| Outcomes   | Body-Mass Index (BMI) z score, anemia, change in anthropometry (e.g., height and weight status, BMI, height-for-age z scores, weight-for-age z scores, weight-for-height z scores, skin-fold thickness measures, stunting, underweight, wasting, body mass index, overweight, obesity, waist-to-height ratio, and central obesity), hemoglobin level in the blood, micronutrient deficiencies, knowledge of diet and nutrition, dietary intake (i.e. amount and frequency), dietary diversity, diet quality, physical activity, sedentary behaviors, nutrition literacy, and nutrition fluency. | Not applicable |

|              |                                                                                                    |                                                                                                                                                                                                                                                             |
|--------------|----------------------------------------------------------------------------------------------------|-------------------------------------------------------------------------------------------------------------------------------------------------------------------------------------------------------------------------------------------------------------|
| Study design | Randomized controlled trials, quasi-experimental studies including controlled before-after studies | Non-randomized trials including controlled before-after studies that did not account for baseline differences, observational studies including cohort, case-control, and cross-sectional designs, and editorial commentaries, opinions, and review articles |
|--------------|----------------------------------------------------------------------------------------------------|-------------------------------------------------------------------------------------------------------------------------------------------------------------------------------------------------------------------------------------------------------------|

192

### 193 Eligibility

194 The inclusion and exclusion criteria for this scoping review are listed below.

#### 195 *Inclusion criteria*

196 We will include the following studies.

- 197 • We will include randomized controlled trials (RCT), with the intervention randomized to  
198 individuals or in clusters (including clubs, groups, communities, villages, homes, etc.), and quasi-  
199 experimental studies including controlled before-after studies that have reported interventions to  
200 address any form of adolescent malnutrition when compared to a control group.
- 201 • Studies involving adolescent boys and/or girls aged 10-19 years.
- 202 • Studies conducted in LMICs—as defined by the World Bank in the year 2023 (15).
- 203 • Studies involving interventions for one or more of the following: micronutrient supplementation,  
204 feeding interventions, nutrition education, physical education, interventions to promote healthy  
205 diets, interventions promoting physical activity, community and/or home gardens, food and  
206 nutrition policies, community environment interventions, water sanitation and hygiene (WASH)  
207 interventions, and structural interventions such as taxation of sweetened-sugary drinks.

- 1  
2  
3 208 • The control (comparison) in each included study can be participants who did not receive any  
4  
5 209 intervention or received standard care, received standard health/nutrition education, or any other  
6  
7 210 intervention in the community setting.  
8  
9 211 • We will include published articles as well as unpublished and grey literature and will include  
10  
11 212 ongoing studies where preliminary findings are available.  
12  
13  
14 213 • We will not place any restrictions on the language, sample size, or duration of the intervention.  
15  
16 214

17  
18 215 ***Exclusion criteria***

19  
20 216 We will not consider the following studies.

- 21  
22 217 • Non-RCTs that are not quasi-experimental studies with comparator groups and controlled before-  
23  
24 218 after studies that did not account for the baseline differences between the study arms.  
25  
26 219 • Observational studies such as cohort, case-control, and cross-sectional designs.  
27  
28  
29 220 • Editorials, commentaries, opinions, and review articles. However, we will use review articles to  
30  
31 221 identify additional original articles.  
32  
33 222 • Clinical treatments/interventions targeted towards individuals with specific medical conditions  
34  
35 223 such as programs intended for underweight, overweight, obese, or anemic adolescents.  
36  
37 224

38  
39 225 **Data management**

40  
41 226 EndNote X9 (Clarivate Analytics, Pennsylvania, United States) or a similar citation management software  
42  
43 227 will be used to store the records retrieved from electronic databases. The records will also be imported into  
44  
45 228 Covidence (Veritas Health Innovation, Melbourne, Australia), an Internet-based systematic review  
46  
47 229 management program. Detection and removal of duplicates will be performed by EndNote (or similar  
48  
49 230 software) and by Covidence.  
50  
51 231

52  
53  
54 232 **Selection of studies**  
55  
56  
57  
58  
59  
60

1  
2  
3 233 Using Covidence, we will screen titles, abstracts, and full texts. First, two reviewers will independently  
4  
5 234 assess all search results (i.e., titles and abstracts) and exclude irrelevant studies based on inclusion and  
6  
7 235 exclusion criteria. Next, two reviewers will carry out the full-text screening based on the same  
8  
9 236 inclusion/exclusion criteria. The reviewers will discuss and resolve any difference of opinion or, if  
10  
11 237 necessary, seek a third reviewer's opinion for resolving differences. A study flow diagram stating the  
12  
13 238 specific reasons for exclusion will be maintained following the PRISMA for Scoping Review statement  
14  
15 239 (PRISMA-ScR) (16).  
16  
17  
18 240

#### 20 241 **Data extraction**

21  
22 242 Two reviewers will independently extract and enter data from studies included in the review. We will  
23  
24 243 develop and test an extraction form on five randomly selected studies. We will extract the following  
25  
26 244 information.

- 27  
28 245 • Study details including the title, authors (first author and corresponding author), the corresponding  
29  
30 246 author's contact information, journal (or source for unpublished reports), calendar year of  
31  
32 247 publication, calendar year of intervention, country, and source of funding.
- 33  
34 248 • Study methods including objectives and/or research questions, type of study, investigation  
35  
36 249 strategies, settings, sample size, and sample characteristics (e.g., age, sex, socioeconomic status
- 37  
38 250 • Intervention strategy including target population, delivery platform and providers (including  
39  
40 251 selection, training, supervision, support, and incentivization), types of nutrition and other  
41  
42 252 interventions (including content, conceptual framework and/or theoretical underpinnings, timing,  
43  
44 253 duration, and dosage or frequency), and comparator/control.
- 45  
46 254 • Outcomes assessed and details of the measures used.
- 47  
48 255 • Findings including the coverage of services, facilitators and barriers to intervention delivery and  
49  
50 256 uptake, effectiveness findings with point estimates and measures of variance (standard errors, 95%
- 51  
52  
53  
54  
55  
56  
57  
58  
59  
60

1  
2  
3 257 confidence intervals, or *p*-values), and any other key findings related to the scoping review  
4  
5 258 questions.  
6

7 259  
8  
9 260 We will contact the corresponding author via email if there is missing or inconsistent information. We will  
10  
11 261 contact the author two times at most. The available data will be analyzed and any gaps due to missing data  
12  
13 262 will be discussed if the data issue cannot be resolved after contacting the authors.  
14  
15

16 263

### 17 18 264 **Risk of bias assessment**

19  
20 265 For the assessment of the risk of bias in the selected studies, we will use the Cochrane Collaboration's  
21  
22 266 revised tool for assessing the risk of bias in randomized trials (RoB 2) (17). Two reviewers will  
23  
24 267 independently evaluate methodological quality. Any uncertainties or disagreements will be resolved by  
25  
26 268 discussion or by a third reviewer, whenever needed. The tool is a domain-based evaluation, in which critical  
27  
28 269 assessments for risk of bias are made separately for various domains, including the randomization process,  
29  
30 270 deviation from intended interventions, missing outcome data, measurement of the outcome, and selective  
31  
32 271 outcome reporting. The risk of bias in clustered trials will be similarly assessed using the risk of bias 2 for  
33  
34 272 cluster-randomized trials (RoB 2 CRT) (18). Additionally, we will use the Risk of Bias in Non-randomized  
35  
36 273 Studies of Interventions (ROBINS-I) tool (19), to assess the risk of bias for controlled before-after studies  
37  
38 274 and non-randomized controlled trials.  
39

40  
41 275

### 42 43 276 **Synthesis of evidence**

44  
45 277 All included studies will be systematically synthesized in the text and a table following the SWiM  
46  
47 278 guidelines (Synthesis Without Meta-analysis) (20). In this synthesis, we will describe how many sources  
48  
49 279 of evidence were screened, assessed for eligibility, and included in the review, along with reasons for  
50  
51 280 exclusion at each stage. Our presentation of included sources of evidence will include summary  
52  
53 281 characteristics and citations, as well as a critical appraisal, if applicable. Studies will be grouped based on  
54  
55 282 methods and interventions, standardized outcomes metrics, synthesis methods, criteria used to prioritize  
56  
57  
58  
59  
60



1  
2  
3 283 results for summary, reporting of results, the certainty of results, heterogeneity in effects, as well as barriers  
4  
5 284 and facilitators to delivering the interventions will be discussed. For continuous outcomes, effect estimates  
6  
7 285 will be expressed as mean differences (with 95% confidence intervals) between the intervention group and  
8  
9 286 the control group; for dichotomous outcomes, effect estimates will be expressed as risk ratios, rate ratios,  
10  
11 287 hazard ratios, or odds ratios (all with a 95% confidence interval). Additionally, we will discuss the  
12  
13 288 limitations of the review process and provide an interpretation of the results concerning the objectives of  
14  
15 289 the review, as well as possible implications or next steps. We will follow the PRISMA Extension for  
16  
17 290 Scoping Reviews (PRISMA-ScR) checklist and guidelines to ensure a robust and replicable process (16).  
18  
19

20 291

### 21 22 292 **Registration and reporting**

23  
24 293 The final protocol was registered prospectively with the Open Science Framework (<https://osf.io/t2d78>) on  
25  
26 294 July 19, 2023, based on the PRISMA Extension for Scoping Reviews (PRISMA-ScR) (16). In the event of  
27  
28 295 protocol amendments, the date of each amendment will be accompanied by a description of each change  
29  
30 296 and the rationale on the Open Science Forum.  
31

32 297

### 33 34 35 298 **Discussion**

36  
37 299 The fight against malnutrition is one of the greatest global health challenges, influenced by economic  
38  
39 300 growth, urbanization, and globalization, as well as shifts in the quality and quantity of human diets. For the  
40  
41 301 period 2016-2025, the United Nations Decade of Action on Nutrition was launched, calling for specific  
42  
43 302 coordinated actions through cross-cutting and coherent policies, programs, and initiatives to address all  
44  
45 303 forms of malnutrition (21). The global community has transitioned from a predominant focus on eliminating  
46  
47 304 severe and acute undernutrition through the Millennium Development Goals (MDGs) to a broader focus on  
48  
49 305 nutrition through the Sustainable Development Goals (SDGs). It is an opportunity for integrated action to  
50  
51 306 address all forms of malnutrition and non-communicable diseases. According to Sustainable Development  
52  
53 307 2030, tracking indicators are also needed to meet targets, specifically for the Global Strategy for Women's,  
54  
55  
56  
57  
58  
59

1  
2  
3 308 Children's, and Adolescents' Health (22). In this review, we will describe and synthesize community-based  
4  
5 309 interventions targeting the many forms of malnutrition among adolescents aged 10-19 from LMICs.  
6

7 310  
8  
9 311 There are a variety of interventions that could be implemented in schools, including the most common and  
10  
11 312 longest-standing one— school feeding (10, 23). Schools provide a platform for interventions that target  
12  
13 313 high-risk groups beyond food, including adolescent girls receiving weekly iron and folic acid supplements  
14  
15 314 (WIFA), nutrition and physical education, promoting a healthy diet and active lifestyle, school gardens  
16  
17 315 and/or farms, creating positive school environments, and water and sanitation interventions (10). While  
18  
19 316 school enrollment has increased significantly since 2000 across the globe and is acknowledged as a central  
20  
21 317 platform for improving nutrition among school-going children and adolescents, around 37% of secondary  
22  
23 318 school-age children in sub-Saharan Africa do not attend school and many of those who do attend are  
24  
25 319 irregular students (24). There is, therefore, a need for new approaches that will improve nutrition literacy,  
26  
27 320 ensure food security, and address specific nutrition challenges among out-of-school adolescents.  
28  
29 321 Consequently, community-based nutrition-specific and nutrition-sensitive interventions targeting multiple  
30  
31 322 forms of malnutrition outcomes of adolescents are needed to synthesize the evidence. In order to improve  
32  
33 323 the nutritional status of adolescents, it is imperative to engage adolescents, families, and communities, and  
34  
35 324 to allow health, education, nutrition, social protection, and other agencies to work together synergistically.  
36  
37 325

38  
39  
40 326 Community-based interventions provide opportunities to engage with a range of adolescent groups and  
41  
42 327 collaborate with various local institutions. Communities can provide interventions and support strategies to  
43  
44 328 improve local food environments and food choices, ranging from non-governmental organizations and  
45  
46 329 religious groups to local businesses, self-help groups, and sports or music clubs (25). Many of the most  
47  
48 330 effective obesity interventions consider a specific social context and are delivered in community settings in  
49  
50 331 high-income countries. For example, in one US study, mentoring from African American community  
51  
52 332 members increased the impact of nutrition interventions on African American young people (26). It is also  
53  
54 333 possible to target social norms and the environmental context of nutritional choices through community  
55  
56  
57  
58  
59  
60

1  
2  
3 334 interventions. With regard to social influences more broadly, adolescents today have access to a much wider  
4  
5 335 range of social networks than their predecessors. As a result of social media and information technology,  
6  
7 336 both social and commercial influences in adolescence have evolved (27). Social media has sometimes been  
8  
9 337 associated with harmful nutrition outcomes—for example, reinforcing weight-related stigma and  
10  
11 338 normalizing unhealthy body image—but it has also helped young people connect with people outside their  
12  
13 339 immediate communities and transformed social opportunities for less mobile people. Despite their  
14  
15 340 enormous potential, there is limited literature evaluating the impact of community-based interventions in  
16  
17 341 LMICs.  
18  
19

20 342  
21  
22 343 Considering the recommendations of the Lancet Commission on Adolescent Health (3), the WHO's Global  
23  
24 344 Accelerated Action for Adolescent Health (28), and the Child and Adolescent Health Volume of Disease  
25  
26 345 Control Priorities (29) that advocate the integration of health and nutrition, we anticipate the results of this  
27  
28 346 review will serve to advance the application of these recommendations. Using the results of this review,  
29  
30 347 future programs can be developed to address the immediate and growing needs of adolescents in community  
31  
32 348 settings. In addition, future programs can include approaches to connecting such interventions with schools,  
33  
34 349 families, and the broader community. In addition, these findings can help policymakers, researchers,  
35  
36 350 practitioners, government agencies, and non-governmental organizations develop and implement  
37  
38 351 interventions to improve adolescents' integrated health and address malnutrition and other health outcomes  
39  
40 352 in LMICs.  
41  
42

43 353

#### 45 354 **Ethics and dissemination**

46  
47 355 This study is a scoping review that does not require ethics approval because it involves a methodical  
48  
49 356 presentation of available resources. The protocol aims to provide an overview of the broad literature on  
50  
51 357 community-based interventions targeting multiple forms of malnutrition among adolescents in LMICs.  
52  
53 358 Additionally, the submitted review will help identify effective interventions, determine gaps and disparities  
54  
55  
56  
57  
58  
59

1  
2  
3 359 among interventions, and provide insight for policymakers to develop and design as well as implement  
4  
5 360 future programs.  
6

### 7 361 **Author Contributors**

8  
9 362 SS conceived the idea, developed the methods, and wrote the first draft of the manuscript. ALK, MR, and  
10  
11 363 UP contributed to the methods and supported the drafting and editing of the manuscript. ALK and MR  
12  
13 364 contributed meaningfully to the design of the search strategy. SO, NM, DOA, CN, SL, TB, WWF, and  
14  
15 365 ARISE-NUTRINT study collaborators supervised and reviewed the protocol. All authors revised and  
16  
17 366 approved the final manuscript.  
18

### 19 367 **Funding**

20  
21  
22 368 This study was funded by the European Union Horizon 2022. Views and opinions expressed are however  
23  
24 369 those of the author(s) only and do not necessarily reflect those of the European Union. Neither the European  
25  
26 370 Union nor the granting authority can be held responsible for them.  
27

### 28 371 **Competing interests**

29  
30 372 None declared.  
31

### 32 373 **Patient consent for publication**

33  
34 374 Not required  
35

### 36 375 **Provenance and peer review**

37  
38 376 Not commissioned, externally peer-reviewed  
39  
40  
41 377

### 42 378 **References**

- 43  
44  
45 379 1. United Nations Children's Fund. Progress for Children: A Report Card on Adolescents No. 10.  
46  
47 380 2012. Available at [www.unicef.org/publications/files/Progress\\_for\\_Children\\_-](http://www.unicef.org/publications/files/Progress_for_Children_-_No._10_EN_04272012.pdf)  
48  
49 381 [\\_No.\\_10\\_EN\\_04272012.pdf](http://www.unicef.org/publications/files/Progress_for_Children_-_No._10_EN_04272012.pdf).  
50  
51 382 2. United Nations. Department of Economic and Social Affairs, Population Division. World  
52  
53 383 population prospects, the 2012 revision. Available at: <https://population.un.org/wpp/>  
54  
55  
56  
57  
58  
59

- 1  
2  
3  
4 384 3. Patton GC, Sawyer SM, Santelli JS, et al. Our future: a Lancet commission on adolescent health  
5  
6  
7 385 and well-being. *Lancet* 2016;387:2423-78.  
8  
9  
10 386 4. Patton GC, Olsson C, Skirbekk V, et al. Adolescence and the next generation. *Nature* 2018;554:  
11  
12  
13 387 458–66.  
14  
15  
16 388 5. Canavan CR, Fawzi WW. Addressing knowledge gaps in adolescent nutrition: Towards advancing  
17  
18  
19 389 public health and sustainable development. *Curr Dev Nutr* 2019;3:nzz062.  
20  
21  
22 390 6. World Health Organization. Global health estimates: leading causes of DALYs. Available at:  
23  
24  
25 391 [https://www.who.int/data/gho/data/themes/mortality-and-global-health-estimates/global-health-](https://www.who.int/data/gho/data/themes/mortality-and-global-health-estimates/global-health-estimates-leading-causes-of-dalys)  
26  
27  
28 392 [estimates-leading-causes-of-dalys](https://www.who.int/data/gho/data/themes/mortality-and-global-health-estimates/global-health-estimates-leading-causes-of-dalys)  
29  
30  
31 393 7. Norris SA, Frongillo EA, Black MM, et al. Nutrition in adolescent growth and development. *Lancet*  
32  
33  
34 394 2022;299:172-84.  
35  
36  
37 395 8. Hargreaves D, Mates E, Menon P, et al. Strategies and interventions for healthy adolescent growth,  
38  
39  
40 396 nutrition and development. *Lancet* 2022;299:198-210.  
41  
42  
43 397 9. Roche ML, Samson KLI, Green TJ, et al. Perspective: Weekly Iron and Folic Acid  
44  
45  
46 398 Supplementation (WIFAS): A critical review and rationale for inclusion in the essential medicines  
47  
48  
49 399 list to accelerate anemia and neural tube defects reduction. *Adv Nutr*. 2021;12:334-42.  
50  
51  
52  
53  
54  
55  
56  
57  
58  
59  
60

- 1  
2  
3  
4 400 10. Shinde S, Wang D, Moulton GE, et al. School-based health and nutrition interventions addressing  
5  
6 401 double burden of malnutrition and educational outcomes of adolescents in low- and middle-income  
7  
8  
9 402 countries: A systematic review. *Matern Child Nutr* 2023:e13437. doi: [10.1111/mcn.13437](https://doi.org/10.1111/mcn.13437)  
10  
11  
12 403 11. Kyere P, Veerman JL, Lee P, et al. Effectiveness of school-based nutrition interventions in sub-  
13  
14 404 Saharan Africa: a systematic review. *Public Health Nutr* 2020;23:2626-36.  
15  
16 405 12. Van Cauwenberghe E, Maes L, Spittaels H, et al. Effectiveness of school-based interventions in  
17  
18 406 Europe to promote healthy nutrition in children and adolescents: systematic review of published  
19  
20 407 and 'grey' literature. *Br J Nutr* 2010;103:781-97.  
21  
22 408 13. Pongutta S, Ajetunmobi O, Davey C, et al. Impacts of school nutrition interventions on the  
23  
24 409 nutritional status of school-aged children in Asia: A systematic review and meta-analysis.  
25  
26 410 *Nutrients*. 2022;14:589. doi: 10.3390/nu14030589.  
27  
28 411 14. Hawkes C, Ruel M, Salm L, et al. Double-duty actions: seizing programme and policy opportunities  
29  
30 412 to address malnutrition in all its forms. *Lancet* 2019;395:142-55.  
31  
32 413 15. World Bank designated developing countries 2023. World bank. Available at:  
33  
34 414 <https://www.endocrine.org/membership/join/developing-country-list>  
35  
36 415 16. Tricco AC, Lillie E, Zarin W, et al. PRISMA Extension for Scoping Reviews (PRISMA-ScR):  
37  
38 416 Checklist and Explanation. *Ann Intern Med* 2018;169:467-73.  
39  
40 417 17. Sterne JAC, Savović J, Page MJ, et al. RoB 2: a revised tool for assessing the risk of bias in  
41  
42 418 randomized trials. *BMJ* 2019;366:14898.  
43  
44  
45  
46  
47  
48  
49  
50  
51  
52  
53  
54  
55  
56  
57  
58  
59  
60

- 1  
2  
3  
4 419 18. Eldridge S, Campbell M, Cambell M, et al. Revised Cochrane risk of bias tool for randomized trials  
5  
6  
7 420 (RoB 2.0) additional considerations for cluster randomized trials. Available at:  
8  
9  
10 421 <https://www.unisa.edu.au/contentassets/72bf75606a2b4abcaf7f17404af374ad/rob2->  
11  
12  
13 422 [0\\_cluster\\_parallel\\_guidance.pdf](#)  
14  
15  
16 423 19. Sterne JA, Hernán MA, Reeves BC, et al. ROBINS-I: a tool for assessing the risk of bias in non-  
17  
18  
19 424 randomized studies of interventions. *BMJ* 2016;355: i4919.  
20  
21  
22 425 20. Campbell M, McKenzie JE, Sowden A, et al. Synthesis without meta-analysis (SWiM) in  
23  
24  
25 426 systematic reviews: reporting guideline. *BMJ* 2020;368:l6890.  
26  
27  
28 427 21. United Nations. United Nations Decade of Action on Nutrition 2016-2025. [www.un.org/nutrition](http://www.un.org/nutrition).  
29  
30  
31 428 22. Kuruvilla S, Bustreo F, Kuo T, et al. The Global strategy for women’s children’s and adolescents’  
32  
33  
34 429 health (2016–2030): a roadmap based on evidence and country experience. *Bull World Health*  
35  
36  
37 430 *Organ* 2016;94:398–400.  
38  
39  
40 431 23. Wang D, Shinde S, Young T, et al. Impacts of school feeding on educational and health outcomes  
41  
42 432 of school-age children and adolescents in low- and middle-income countries: A systematic review  
43  
44 433 and meta-analysis. *J Glob Health* 2021;11:04051.  
45  
46  
47 434 24. The World Bank Adolescents out of school (% of lower secondary school age). Available at:  
48  
49 435 <https://data.worldbank.org/indicator/SE.SEC.UNER.LO.ZS>  
50  
51 436 25. Hargreaves D, Mates E, Menon P, et al. Strategies and interventions for healthy adolescent growth,  
52  
53 437 nutrition, and development. *Lancet* 2022;399:198-210.  
54  
55  
56  
57  
58  
59  
60

- 1  
2  
3 438 26. Lofton S, Julion WA, McNaughton DB, et al. A systematic review of literature on culturally  
4 adapted obesity prevention interventions for African American youth. *J Sch Nur* 2016;32:32-46.  
5 439  
6  
7 440 27. Chau MM, Burgermaster M, Mamykina L. The use of social media in nutrition interventions for  
8 adolescents and young adults-A systematic review. *Int J Med Inform* 2018;120:77-91.  
9 441  
10  
11 442 28. World Health Organization. Global Accelerated Action for the Health of Adolescents (AA-HA!):  
12 guidance to support country implementation. Geneva: World Health Organization; 2017.  
13 443  
14  
15 444 29. Lassi Z, Moin A, Bhutta Z. Nutrition in middle childhood and adolescence. (in Eds) Bundy D,  
16 de'Silva N, Horton S, Hamison DT, Patton GC. *Child and adolescent health development. Disease*  
17 *Control Priorities 3<sup>rd</sup> Edition*. Washington DC: World Bank, 2017.  
18 445  
19  
20  
21 446  
22  
23  
24  
25  
26  
27 447



Supplementary file 1: PubMed search strategy

| No. | Concept                                                                                                                                                                                                                                                                              | PubMed search terms                                                                                                                                                                                                                                                                                                                                                                                                                                                                                                                                                                                                                                                                                                                                                                                                                                                                                                                                                                                                                                                                                                                                                                                                                                                                                                                                                                                                                                                             |
|-----|--------------------------------------------------------------------------------------------------------------------------------------------------------------------------------------------------------------------------------------------------------------------------------------|---------------------------------------------------------------------------------------------------------------------------------------------------------------------------------------------------------------------------------------------------------------------------------------------------------------------------------------------------------------------------------------------------------------------------------------------------------------------------------------------------------------------------------------------------------------------------------------------------------------------------------------------------------------------------------------------------------------------------------------------------------------------------------------------------------------------------------------------------------------------------------------------------------------------------------------------------------------------------------------------------------------------------------------------------------------------------------------------------------------------------------------------------------------------------------------------------------------------------------------------------------------------------------------------------------------------------------------------------------------------------------------------------------------------------------------------------------------------------------|
| #1  | <b>Randomized controlled trial</b><br><b>Controlled before-after studies</b><br><b>Quasi-experimental studies</b>                                                                                                                                                                    | ("randomized controlled trial"[pt] OR "random allocation"[mesh] OR "cross-over studies"[mesh] OR "Controlled Before-After Studies"[Mesh] OR quasi experiment*[tiab] OR quasiexperiment*[tiab] OR "quasi-experiment*"[tiab])                                                                                                                                                                                                                                                                                                                                                                                                                                                                                                                                                                                                                                                                                                                                                                                                                                                                                                                                                                                                                                                                                                                                                                                                                                                     |
| #2  | <b>Nutrition and health interventions</b><br>(dietary supplements, healthy diet, healthy eating, healthy nutrition, weight control, weight management, micronutrient supplementation diet/nutrition education, physical activity, community/home garden, WASH, and nutrition policy) | ("Health Education"[Mesh:NoExp] OR "Health Promotion"[Mesh]) OR ("Adolescent Health Services"[Mesh] OR "Preventive Health Services"[Mesh:NoExp]) OR (preventive health[tiab]) OR ("Dietary Supplements"[Mesh] OR dietary supplement*[tiab] micronutrient supplement*[tiab] OR folic acid supplement*[tiab] OR MMN[tiab] OR nutrient supplement*[tiab] OR nutritional supplement*[tiab]) OR ("Diet, Healthy"[Mesh] OR healthy diet*[tiab] OR healthy eating[tiab] OR healthy food*[tiab] OR diet education[tiab] OR dietary education[tiab] OR dietary intervention[tiab] OR healthy eating[tiab] OR healthy food*[tiab] OR healthy diet*[tiab] OR healthy nutrition*[tiab] OR nutrition counsel*[tiab] OR nutritional counsel*[tiab]) OR (nutrition education[tiab] OR nutrition intervention[tiab] OR nutritional education[tiab] OR nutritional intervention[tiab]) OR ("exercise"[MeSH] OR "exercise" [tiab] OR "physical activity"[tiab] OR fitness*[tiab] OR sport*[tiab]) OR ("nutrition policy"[MeSH] OR "nutrition"[tiab] AND "policy"[tiab] OR "nutrition policy"[tiab])                                                                                                                                                                                                                                                                                                                                                                                               |
| #3  | <b>Adolescents</b>                                                                                                                                                                                                                                                                   | ("Adolescent"[Mesh] OR adolescent[tiab] OR adolescents[tiab] OR adolescence[tiab] OR teen[tiab] OR teens[tiab] OR teenage*[tiab])                                                                                                                                                                                                                                                                                                                                                                                                                                                                                                                                                                                                                                                                                                                                                                                                                                                                                                                                                                                                                                                                                                                                                                                                                                                                                                                                               |
| #4  | <b>Low- and middle-income countries</b>                                                                                                                                                                                                                                              | (Afghanistan*[tiab] OR Albania*[tiab] OR Algeria*[tiab] OR Samoa*[tiab] OR Angola*[tiab] OR Armenia*[tiab] OR Azerbaijan*[tiab] OR Bangladesh*[tiab] OR Bengali[tiab] OR Belarus*[tiab] OR Belize[tiab] OR Benin[tiab] OR Bhutan*[tiab] OR Bolivia*[tiab] OR Bosnia*[tiab] OR Herzegovina*[tiab] OR Botswana*[tiab] OR Brazil*[tiab] OR Bulgaria*[tiab] OR "Burkina Faso"[tiab] OR Burkinabe[tiab] OR Burundi*[tiab] OR "Cabo Verd"[tiab] OR "Cape Verd"[tiab] OR Cambodia*[tiab] OR Cameroon*[tiab] OR "Central African"[tiab] OR Chad*[tiab] OR China[tiab] OR Chinese[tiab] OR Colombia*[tiab] OR Comoros[tiab] OR Congo[tiab] OR "Costa Rica"[tiab] OR "Cote d'Ivoire"[tiab] OR "Ivory Coast"[tiab] OR Cuba[tiab] OR Cuban[tiab] OR Djibouti[tiab] OR Dominica*[tiab] OR Ecuador[tiab] OR Egypt*[tiab] OR "El Salvador"[tiab] OR Eritrea*[tiab] OR Ethiopia*[tiab] OR Fiji*[tiab] OR Gabon*[tiab] OR Gambia*[tiab] OR Georgia*[tiab] OR Ghana*[tiab] OR Grenada*[tiab] OR Guatemala*[tiab] OR Guinea*[tiab] OR Guyan*[tiab] OR Haiti*[tiab] OR Hondura*[tiab] OR India[tiab] OR Indian*[tiab] OR Indonesia*[tiab] OR Iran*[tiab] OR Iraq*[tiab] OR Jamaica*[tiab] OR Jordan*[tiab] OR Kazakh*[tiab] OR Kenya*[tiab] OR Kiribati[tiab] OR "People's Republic of Korea"[tiab] OR "North Korea"[tiab] OR Kosovo[tiab] OR Kosovar*[tiab] OR Kyrgyz*[tiab] OR Lao[tiab] OR Laos[tiab] OR Laotian*[tiab] OR Lebanon[tiab] OR Lebanes*[tiab] OR Lesotho[tiab] OR Liberia*[tiab] OR |

|  |                                                                                                                                                                                                                                                                                                                                                                                                                                                                                                                                                                                                                                                                                                                                                                                                                                                                                                                                                                                                                                                                                                                                                                                                                                                                                                                                                                                                                                                                                                                           |
|--|---------------------------------------------------------------------------------------------------------------------------------------------------------------------------------------------------------------------------------------------------------------------------------------------------------------------------------------------------------------------------------------------------------------------------------------------------------------------------------------------------------------------------------------------------------------------------------------------------------------------------------------------------------------------------------------------------------------------------------------------------------------------------------------------------------------------------------------------------------------------------------------------------------------------------------------------------------------------------------------------------------------------------------------------------------------------------------------------------------------------------------------------------------------------------------------------------------------------------------------------------------------------------------------------------------------------------------------------------------------------------------------------------------------------------------------------------------------------------------------------------------------------------|
|  | Libya*[tiab] OR Macedonia*[tiab] OR Madagascar*[tiab] OR Malawi*[tiab] OR Malaysia*[tiab] OR Maldives[tiab] OR Mali[tiab] OR "Marshall Island*" [tiab] OR "Mexico"[MeSH] OR Mexico[tiab] OR Mexican*[tiab] OR Micronesia*[tiab] OR Moldova*[tiab] OR Mongolia*[tiab] OR Montenegr*[tiab] OR Morocc*[tiab] OR Mozambique[tiab] OR Myanmar[tiab] OR Burmese*[tiab] OR Burma[tiab] OR Namibia*[tiab] OR Nepal*[tiab] OR Nicaragua*[tiab] OR Niger*[tiab] OR Pakistan*[tiab] OR Paraguay*[tiab] OR Peru*[tiab] OR Philippin*[tiab] OR Rwanda*[tiab] OR "Sao Tome"[tiab] OR Principe[tiab] OR Senegal*[tiab] OR Serbia*[tiab] OR "Sierra Leone*" [tiab] OR "Solomon Island*" [tiab] OR Somalia*[tiab] OR "South Africa*" [tiab] OR "Sri Lanka"[tiab] OR "St Lucia"[tiab] OR "Saint Lucia"[tiab] OR "St Vincent"[tiab] OR "Saint Vincent"[tiab] OR Grenad*[tiab] OR Sudan*[tiab] OR Suriname*[tiab] OR Swaziland*[tiab] OR Eswatini*[tiab] OR Syria*[tiab] OR Tajik*[tiab] OR Tanzania*[tiab] OR Zanzibar[tiab] OR Thai*[tiab] OR Timor*[tiab] OR Togo*[tiab] OR Tonga*[tiab] OR Tunisia*[tiab] OR Turkey[tiab] OR Turkish[tiab] OR Turkmen*[tiab] OR Tuvalu*[tiab] OR Uganda*[tiab] OR Ukrain*[tiab] OR Uzbeki*[tiab] OR Vanuatu*[tiab] OR Venezuela*[tiab] OR Vietnam*[tiab] OR "Viet nam*" [tiab] OR "West Bank"[tiab] OR Gaza*[tiab] OR Palestin*[tiab] OR Yemen*[tiab] OR Zambia*[tiab] OR Zimbabw*[tiab] OR "Western Sahara"[tiab] OR Argentin*[tiab] OR Russia*[tiab] OR Maurit*[tiab] OR Palau[tiab] OR Romania*[tiab]) |
|--|---------------------------------------------------------------------------------------------------------------------------------------------------------------------------------------------------------------------------------------------------------------------------------------------------------------------------------------------------------------------------------------------------------------------------------------------------------------------------------------------------------------------------------------------------------------------------------------------------------------------------------------------------------------------------------------------------------------------------------------------------------------------------------------------------------------------------------------------------------------------------------------------------------------------------------------------------------------------------------------------------------------------------------------------------------------------------------------------------------------------------------------------------------------------------------------------------------------------------------------------------------------------------------------------------------------------------------------------------------------------------------------------------------------------------------------------------------------------------------------------------------------------------|

# BMJ Open

## Community-based interventions targeting multiple forms of malnutrition among adolescents in low- and middle-income countries: protocol for a scoping review

|                                 |                                                                                                                                                                                                                                                                                                                                                                                                                                                                                                                                                                                                                                                                                                                                                                                                                                                                                                                                                                                                                                                                                                                                                                                                                                                                                                                                                                                                                                                                                                                                                                                                                                                      |
|---------------------------------|------------------------------------------------------------------------------------------------------------------------------------------------------------------------------------------------------------------------------------------------------------------------------------------------------------------------------------------------------------------------------------------------------------------------------------------------------------------------------------------------------------------------------------------------------------------------------------------------------------------------------------------------------------------------------------------------------------------------------------------------------------------------------------------------------------------------------------------------------------------------------------------------------------------------------------------------------------------------------------------------------------------------------------------------------------------------------------------------------------------------------------------------------------------------------------------------------------------------------------------------------------------------------------------------------------------------------------------------------------------------------------------------------------------------------------------------------------------------------------------------------------------------------------------------------------------------------------------------------------------------------------------------------|
| Journal:                        | <i>BMJ Open</i>                                                                                                                                                                                                                                                                                                                                                                                                                                                                                                                                                                                                                                                                                                                                                                                                                                                                                                                                                                                                                                                                                                                                                                                                                                                                                                                                                                                                                                                                                                                                                                                                                                      |
| Manuscript ID                   | bmjopen-2023-078969.R1                                                                                                                                                                                                                                                                                                                                                                                                                                                                                                                                                                                                                                                                                                                                                                                                                                                                                                                                                                                                                                                                                                                                                                                                                                                                                                                                                                                                                                                                                                                                                                                                                               |
| Article Type:                   | Protocol                                                                                                                                                                                                                                                                                                                                                                                                                                                                                                                                                                                                                                                                                                                                                                                                                                                                                                                                                                                                                                                                                                                                                                                                                                                                                                                                                                                                                                                                                                                                                                                                                                             |
| Date Submitted by the Author:   | 23-Feb-2024                                                                                                                                                                                                                                                                                                                                                                                                                                                                                                                                                                                                                                                                                                                                                                                                                                                                                                                                                                                                                                                                                                                                                                                                                                                                                                                                                                                                                                                                                                                                                                                                                                          |
| Complete List of Authors:       | <p>Kurniawan, Adi Lukas; Heidelberg University, Heidelberg Institute of Global Health<br/>         Ranisavljev, Marijana; University of Novi Sad, Faculty of Sport and Physical Education<br/>         Partap, Uttara; Harvard University T H Chan School of Public Health, Department of Global Health and Population<br/>         Shinde, Sachin ; Harvard University T H Chan School of Public Health, Department of Global Health and Population; Central for Inquiry into Mental Health<br/>         Ferrero, Elisabetta; Harvard University T H Chan School of Public Health<br/>         Ostojic, Sergej; University of Novi Sad, Faculty of Medicine; University of Agder, Department of Nutrition and Public Health<br/>         Mkwanazi, Ntombizodumo; University of KwaZulu-Natal, Research Division<br/>         Alangea, Deda Ogum; University of Ghana, Department of Population, Family, and Reproductive Health<br/>         Neumann, Christine; Heidelberg University, Heidelberg Institute of Global Health<br/>         Liu, Shuyan; Charité Universitätsmedizin Berlin, Department of Psychiatry and Psychotherapy<br/>         Bärnighausen, Till ; Heidelberg University, Heidelberg Institute of Global Health; Africa Health Research Institute<br/>         Fawzi, Wafaie.; Harvard University T H Chan School of Public Health, Department of Global Health and Population; Harvard University T H Chan School of Public Health, Department of Nutrition<br/>         Collaborators, ARISE-NUTRINT; Heidelberg University, Heidelberg Institute of Global Health; Harvard University T H Chan School of Public Health</p> |
| <b>Primary Subject Heading</b>: | Nutrition and metabolism                                                                                                                                                                                                                                                                                                                                                                                                                                                                                                                                                                                                                                                                                                                                                                                                                                                                                                                                                                                                                                                                                                                                                                                                                                                                                                                                                                                                                                                                                                                                                                                                                             |
| Secondary Subject Heading:      | Global health, Public health, Research methods                                                                                                                                                                                                                                                                                                                                                                                                                                                                                                                                                                                                                                                                                                                                                                                                                                                                                                                                                                                                                                                                                                                                                                                                                                                                                                                                                                                                                                                                                                                                                                                                       |
| Keywords:                       | Adolescent, NUTRITION & DIETETICS, Health Education, Systematic Review, Anaemia < HAEMATOLOGY                                                                                                                                                                                                                                                                                                                                                                                                                                                                                                                                                                                                                                                                                                                                                                                                                                                                                                                                                                                                                                                                                                                                                                                                                                                                                                                                                                                                                                                                                                                                                        |
|                                 |                                                                                                                                                                                                                                                                                                                                                                                                                                                                                                                                                                                                                                                                                                                                                                                                                                                                                                                                                                                                                                                                                                                                                                                                                                                                                                                                                                                                                                                                                                                                                                                                                                                      |

1  
2  
3  
4  
5  
6  
7  
8  
9  
10  
11  
12  
13  
14  
15  
16  
17  
18  
19  
20  
21  
22  
23  
24  
25  
26  
27  
28  
29  
30  
31  
32  
33  
34  
35  
36  
37  
38  
39  
40  
41  
42  
43  
44  
45  
46  
47  
48  
49  
50  
51  
52  
53  
54  
55  
56  
57  
58  
59  
60

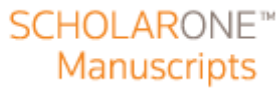

1  
2  
3 **1 Community-based interventions targeting multiple forms of malnutrition among adolescents**  
4  
5 **2 in low- and middle-income countries: protocol for a scoping review**  
6

7 3 Adi Lukas Kurniawan <sup>1</sup>, Marijana Ranisavljev <sup>2</sup>, Uttara Partap <sup>3</sup>, Sachin Shinde <sup>3,4,\*</sup>, Elisabetta Ferrero <sup>3</sup>,  
8  
9 4 Sergej Ostojic <sup>5,6</sup>, Ntombizodumo Mkwanzazi <sup>7</sup>, Deda Ogum Alangea <sup>8</sup>, Christine Neumann <sup>1</sup>, Shuyan Liu  
10  
11 9, Till Bärnighausen <sup>1,10</sup>, Wafaie W Fawzi <sup>3,11,12</sup>, ARISE-NUTRINT collaborators <sup>13</sup>.  
12  
13  
14 6

15  
16 7 <sup>1</sup>Heidelberg Institute of Global Health, Heidelberg University Hospital, Heidelberg, Germany. Email:  
17  
18 8 [lukas.kurniawan@uni-heidelberg.de](mailto:lukas.kurniawan@uni-heidelberg.de) (ALK); [till.baernighausen@uni-heidelberg.de](mailto:till.baernighausen@uni-heidelberg.de) (TB);  
19  
20 9 [christine.neumann@uni-heidelberg.de](mailto:christine.neumann@uni-heidelberg.de) (CN)  
21

22 10 <sup>2</sup>Faculty of Sport and Physical Education, University of Novi Sad, Vojvodina, Serbia. Email:  
23  
24 11 [marijanaranisavljev@gmail.com](mailto:marijanaranisavljev@gmail.com) (MR)  
25

26 12 <sup>3</sup>Department of Global Health and Population, Harvard T. H. Chan School of Public Health, Boston,  
27  
28 13 Massachusetts, USA. Email: [mina@hsph.harvard.edu](mailto:mina@hsph.harvard.edu) (WWF); [upartap@hsph.harvard.edu](mailto:upartap@hsph.harvard.edu) (UP)  
29

30 14 <sup>4</sup>Center for Inquiry into Mental Health, Pune, Maharashtra, India.  
31

32 15 <sup>5</sup>Faculty of Medicine, University of Novi Sad, Novi Sad, Serbia. Email: [sergej.ostojic@chess.edu.rs](mailto:sergej.ostojic@chess.edu.rs) (SO)  
33

34 16 <sup>6</sup>Department of Nutrition and Public Health, University of Agder, Kristiansand, Norway.  
35

36  
37 17 <sup>7</sup>Research Division, University of KwaZulu-Natal, Durban, South Africa. Email:  
38  
39 18 [MkwanzaziN2@ukzn.ac.za](mailto:MkwanzaziN2@ukzn.ac.za) (NM)  
40

41 19 <sup>8</sup>Department of Population, Family, and Reproductive Health, School of Public Health, University of  
42  
43 20 Ghana, Accra, Ghana. Email: [DOgumAlangea@ug.edu.gh](mailto:DOgumAlangea@ug.edu.gh) (DOA)  
44

45 21 <sup>9</sup>Department of Psychiatry and Neurosciences, Charité Berlin University Medicine, Berlin, Germany.  
46  
47 22 Email: [shuyan.liu@charite.de](mailto:shuyan.liu@charite.de) (SL)  
48

49 23 <sup>10</sup>Africa Health Research Institute, Durban, South Africa.  
50

51 24 <sup>11</sup>Department of Epidemiology, Harvard T. H. Chan School of Public Health, Boston, Massachusetts, USA.  
52

53 25 <sup>12</sup>Department of Nutrition, Harvard T. H. Chan School of Public Health, Boston, Massachusetts, USA.  
54

55  
56 26 <sup>13</sup>ARISE-NUTRINT collaborators:  
57  
58  
59  
60

- 1  
2  
3 27 Michael Laxy, Professorship of Public Health and Prevention, Technical University of Munich, Germany.  
4  
5 28 Jacob Burns, Professorship of Public Health and Prevention, Technical University of Munich, Germany.  
6  
7 29 Sara Pedron, Professorship of Public Health and Prevention, Technical University of Munich, Germany.  
8  
9 30 Mary Mwanyika Sando, Africa Academy for Public Health, Tanzania.  
10  
11 31 Ayoade Oduola, University of Ibadan Research Foundation, Nigeria.  
12  
13 32 Mosa Moshabela, University of KwaZulu-Natal, South Africa.  
14  
15 33 Ali Sié, National Institute of Public Health, Nouna Health Research Center, Burkina Faso.  
16  
17 34 David Guwatudde, School of Public Health, Makerere University, Uganda.  
18  
19 35 Yemane Berhane, Addis Continental Institute of Public Health, Ethiopia.  
20  
21 36 Adom Manu, Department of Population, Family, and Reproductive Health, University of Ghana, Ghana.  
22  
23 37 Jan A.C. Hontelez, Erasmus Universitair Medisch Centrum, The Netherlands.  
24  
25 38 Magda Rosenmöller, Center for Research in Healthcare Innovation Management, IESE Business School,  
26  
27 Spain.  
28  
29 39 Irene Brandt, Heidelberg Institute of Global Health, Heidelberg University Hospital, Germany.  
30  
31 40 Ina Danquah, Heidelberg Institute of Global Health, Heidelberg University Hospital, Germany.  
32  
33 41 Matthias Kern, Heidelberg Institute of Global Health, Heidelberg University Hospital, Germany.  
34  
35 42 Joy Mauti, Heidelberg Institute of Global Health, Heidelberg University Hospital, Germany.  
36  
37 43 Shannon McMahon, Heidelberg Institute of Global Health, Heidelberg University Hospital, Germany.  
38  
39 44 Japhet Killewo, Muhimbili University of Health and Allied Sciences, Tanzania.  
40  
41 45 Hanna Y. Berhane, Department of Nutrition and Behavioral Sciences, Addis Continental Institute of Public  
42  
43 Health, Ethiopia.  
44  
45 46 Amani Tinkasimile, Africa Academy for Public Health, Tanzania.  
46  
47 47 Mashavu Yussuf, Africa Academy for Public Health, Tanzania.  
48  
49 48 Innocent Yusufu, Africa Academy for Public Health, Tanzania.  
50  
51 49 Laetitia Paumard, Center for Research in Healthcare Innovation Management, IESE Business School,  
52  
53 Spain.  
54  
55  
56  
57  
58  
59  
60

- 1  
2  
3 53 Millogo Ourohiré, National Institute of Public Health, Nouna Health Research Center, Burkina Faso.  
4  
5 54 Erick Agure, Heidelberg Institute of Global Health, Heidelberg University Hospital, Germany.  
6  
7 55 Jabulani Ncayiyana, College of Health Sciences, University of KwaZulu-Natal, South Africa.  
8  
9 56 Bruno Sunguya, School of Public Health and Social Sciences, Muhimbili University of Health and Allied  
10  
11 57 Sciences, Tanzania.  
12  
13 58 Tiwatayo Lasebikan, Center for Research in Healthcare Innovation Management, IESE Business School,  
14  
15 59 Spain.  
16  
17 60 Marina Taonda, National Institute of Public Health, Nouna Health Research Center, Burkina Faso.  
18  
19 61 Sylvain Somé, National Institute of Public Health, Nouna Health Research Center, Burkina Faso.  
20  
21 62 Clarisse Dah, National Institute of Public Health, Nouna Health Research Center, Burkina Faso.  
22  
23 63 Katian Napon, National Institute of Public Health, Nouna Health Research Center, Burkina Faso.  
24  
25 64 Moussa Ouédraogo, National Institute of Public Health, Nouna Health Research Center, Burkina Faso.  
26  
27  
28  
29

30 66 \*Correspondence: Sachin Shinde, Department of Global Health and Population, Harvard T.H. Chan School  
31  
32 of Public Health, 3<sup>rd</sup> Floor, 90 Smith St. Boston, MA 02120, USA. Email: [sshinde@hsph.harvard.edu](mailto:sshinde@hsph.harvard.edu)  
33  
34

35 68

36  
37 69 **Word count:** 2581 (not including title page, abstract, references, tables, or acknowledgement)  
38

39 70  
40  
41  
42  
43  
44  
45  
46  
47  
48  
49  
50  
51  
52  
53  
54  
55  
56  
57  
58  
59  
60

1  
2  
3 **71 Abstract**  
4

5 **72 Background:** Adolescent malnutrition is a significant public health challenge in low- and middle-income  
6  
7 **73** countries (LMICs), with long-term consequences for health and development. Community-based  
8  
9 **74** interventions have the potential to address multiple forms of malnutrition and improve the health outcomes  
10  
11 **75** of adolescents. However, there is a limited understanding of the content, implementation, and effectiveness  
12  
13 **76** of these interventions. This scoping review aims to synthesize evidence on community-based interventions  
14  
15 **77** targeting multiple forms of malnutrition among adolescents in LMICs and describe their effects on nutrition  
16  
17 **78** and health.

18  
19  
20 **79 Methods and analysis:** A comprehensive search strategy will be implemented in multiple databases  
21  
22 **80** including MEDLINE (through PubMed), Embase, CENTRAL (through Cochrane Library), and grey  
23  
24 **81** literature, covering the period from January 1, 2000, to July 14, 2023. We will follow the Participants,  
25  
26 **82** Concept, and Context (PCC) model to design the search strategy. The inclusion criteria encompass  
27  
28 **83** randomized controlled trials and quasi-experimental studies focusing on adolescents aged 10-19 years.  
29  
30 **84** Various types of interventions, such as micronutrient supplementation, nutrition education, feeding  
31  
32 **85** interventions, physical activity, and community environment interventions, will be considered. Two  
33  
34 **86** reviewers will perform data extraction independently, and, where relevant, risk of bias assessment will be  
35  
36 **87** conducted using standard Cochrane risk-of-bias tools. We will follow the PRISMA Extension for Scoping  
37  
38 **88** Reviews checklist while reporting results.

39  
40  
41 **89 Ethics and dissemination:** The scope of this scoping review is restricted to publicly accessible databases  
42  
43 **90** that do not require prior ethical approval for access. The findings of this review will be shared through  
44  
45 **91** publications in peer-reviewed journals, and presentations at international and regional conferences and  
46  
47 **92** stakeholder meetings in LMICs.

48  
49  
50 **93 Scoping review registration:** The final protocol was registered prospectively with the Open Science  
51  
52 **94** Framework on July 19, 2023 (<https://osf.io/t2d78>).

53  
54 **95**  
55  
56 **96**



1  
2  
3 97 **Article Summary**  
4

5 98 Strengths and limitations of this study  
6

- 7 99
- A comprehensive examination of over 20 years of published data will be conducted.
- 8
- Grey literature sources such as government reports and organization websites will also be included.
- 9 100
- There will be a quality assessment of the included quantitative studies.
- 10 101
- The proposed search strategy will be conducted only in three electronic databases.
- 11
- 12
- 13
- 14 102
- 15
- 16
- 17
- 18
- 19
- 20
- 21
- 22
- 23
- 24
- 25
- 26
- 27
- 28
- 29
- 30
- 31
- 32
- 33
- 34
- 35
- 36
- 37
- 38
- 39
- 40
- 41
- 42
- 43
- 44
- 45
- 46
- 47
- 48
- 49
- 50
- 51
- 52
- 53
- 54
- 55
- 56
- 57
- 58
- 59
- 60

For peer review only

## 103 **Introduction**

104 The current global adolescent population surpasses 1.2 billion individuals, with approximately 90 percent  
105 of them residing in low- and middle-income countries (LMICs) (1). Moreover, when considering regional  
106 trends, it is expected that the proportion of young people aged 10 to 24 residing in Sub-Saharan Africa will  
107 experience substantial growth, rising from 245 million in 2015 to 605 million by 2050 (2). In contrast, the  
108 Asia and Pacific region is expected to undergo the most significant decrease, declining from 718 million in  
109 2015 to 619 million by 2050 (2). These regional variations emphasize the unique challenges and  
110 opportunities faced by different regions in terms of future demographic and health challenges, which will  
111 require distinct solutions.

112  
113 Adolescence is a period of rapid physical growth, cognitive development, socio-emotional development,  
114 and cultural development, all of which are strongly influenced by an individual's socioeconomic, cultural,  
115 and physical environments (3). Nutrition plays a crucial role in improving health and development during  
116 this critical stage in life, bringing intergenerational benefits. After the first 1000 days of life, adolescence  
117 is assumed to offer a second window of opportunity for correcting nutritional deficiencies and insufficient  
118 growth since childhood (4).

119  
120 LMICs are experiencing a rapid nutrition transition among adolescents, accompanied on the one hand by  
121 stunting, thinness, anemia, and other micronutrient deficiencies, and on the other hand by an increasing  
122 burden of obesity and non-communicable diseases (5). Malnutrition was the leading cause of disability-  
123 adjusted life years (DALYs) among the 10-14 age group in 2019, followed by iron deficiency anemia  
124 among adolescents aged 10-19 (6). The consumption of diverse and healthy diets by adolescents from  
125 LMICs is declining, while the consumption of processed and calorie-rich foods is on the rise, contributing  
126 to rising obesity rates (7). Furthermore, food insecurity has been aggravated in vulnerable populations  
127 including adolescents in LMICs because of the COVID-19 pandemic, political instability, and recurring  
128 climate crises in the form of flooding and droughts (8).

1  
2  
3 129 Several systematic reviews indicate that micronutrient supplementation is effective in addressing nutritional  
4  
5 130 deficiencies (9,10). Iron supplementation can reduce anemia in adolescents; periconceptional folic acid  
6  
7 131 supplementation among adolescent girls can reduce neural tube defects; and adolescent girls who consume  
8  
9 132 high amounts of calcium ( $\geq 1$  g daily) have lower rates of preeclampsia, preterm birth, or neonatal  
10  
11 133 hospitalization (11). There is limited evidence that protein-energy supplements are effective for adolescents  
12  
13 134 (10).

14  
15 135  
16  
17 136 The burden of malnutrition may be reduced by several nutrition-sensitive interventions, including nutrition  
18  
19 137 education, dietary interventions, physical activity, and food environment interventions (12). Several  
20  
21 138 systematic reviews suggest promising but modest results from discrete nutrition-sensitive interventions  
22  
23 139 aimed at addressing malnutrition in schools (13-15). These single-domain interventions, however, target  
24  
25 140 either undernutrition or overnutrition and operate in *silos*. There is increased interest in addressing health  
26  
27 141 and nutrition behaviors through integrated interventions, generally called "double-duty actions", targeting  
28  
29 142 multiple forms of malnutrition and nutrition-related non-communicable diseases (16). An essential element  
30  
31 143 of this concept is that tackling one form of malnutrition should not prevent addressing another. There is  
32  
33 144 promising evidence that integrated interventions can improve the nutritional status of school-going children  
34  
35 145 and adolescents (12).

36  
37 146  
38  
39 147 Nevertheless, there are several gaps in understanding adolescent nutrition in LMICs. Currently, nutrition-  
40  
41 148 specific, and nutrition-sensitive interventions tend to focus on school-going adolescents, and little is known  
42  
43 149 about their effects on other vulnerable groups of adolescents, such as out-of-school adolescents, migrant  
44  
45 150 adolescents, and HIV-positive adolescents. Another important gap is that most of the school-based  
46  
47 151 interventions target overlapping age groups and there is little known regarding the age-appropriate  
48  
49 152 intervention strategies and delivery mechanisms as well as the specific impact on the adolescent population.  
50  
51 153 Moreover, most of these school-based interventions are delivered by schoolteachers, community health  
52  
53 154 workers, school nurses, or peers in classroom-based settings or during school hours. Despite the importance

1  
2  
3 155 of nutrition-sensitive and nutrition-specific interventions for the health of communities, little evidence  
4  
5 156 exists about their form and function using community platforms.  
6

7 157  
8  
9 158 The purpose of this scoping review is to comprehensively review the literature to describe community-  
10  
11 159 based interventions that address the multiple forms of malnutrition such as obesity, overweight,  
12  
13 160 underweight, wasting, stunting, anemia, and micronutrient deficiencies affecting adolescents in LMICs,  
14  
15 161 and describe the effects of these interventions on nutrition and health. We decided to conduct a scoping  
16  
17 162 review as our primary aim was to summarize the overview of the evidence on community-based  
18  
19 163 interventions for adolescents in LMICs, rather than to pursue a specific clinical or epidemiological question  
20  
21 164 related to these or provide evidence to directly inform policy or practice (17). In the context of this review,  
22  
23 165 community-based interventions refer to any interventions carried out in community settings other than  
24  
25 166 schools, to improve the health among adolescents. Examples include interventions implemented through  
26  
27 167 community youth centers, clubs, or religious centers. By excluding school-community interventions, which  
28  
29 168 have been thoroughly explored in the literature, we can concentrate on interventions that are less common,  
30  
31 169 less understood, and less easy to implement, but that have the potential to reach the most vulnerable groups  
32  
33 170 of adolescents.  
34  
35

36  
37 171

## 38 39 172 **Methods**

### 40 41 173 **Data sources, search terms, and search strategy**

42  
43 174 As part of our primary strategy, we will search MEDLINE (through PubMed), Embase, and CENTRAL  
44  
45 175 (through the Cochrane Library). All databases will be searched for eligible studies from January 1, 2000,  
46  
47 176 through July 14, 2023. We will identify potentially relevant published studies using the combination of  
48  
49 177 medical subject headings (MeSH) and text words denoting nutrition-specific and nutrition-sensitive  
50  
51 178 interventions. We will also examine references and bibliographies of included studies to identify additional  
52  
53 179 sources of information. This search of studies will be supplemented by reviewing ClinicalTrials.gov and  
54  
55 180 organizational websites such as the World Health Organization (WHO), World Bank, United Nations  
56  
57

181 Children's Fund (UNICEF), and United Nations Population Fund (UNFPA). When possible, reports written  
 182 in languages other than English will be translated by colleagues who are native speakers of those  
 183 languages. No study will be considered if it cannot be adequately translated.

184  
 185 We will use the Participants, Concept, and Context (PCC) model (Table 1) to guide our search strategy. The  
 186 search will use indexing terms, including MeSH terms, keywords, and free text words. First, a broad search  
 187 strategy (e.g., type of study [randomized controlled trials, quasi-experiments, or controlled before-after  
 188 studies] AND intervention domain [e.g., nutrition education] AND population [adolescents] AND setting  
 189 [low- and middle-income countries]) will be performed in PubMed. We will confirm the sensitivity of the  
 190 search strategy by identifying several sentinel articles. The PubMed strategy, provided in **Supplementary**  
 191 **File 1**, will be adapted to suit other databases. We will document the following details for each search:  
 192 databases searched, date of search, search strategy (i.e., subject headings and keywords, including if terms  
 193 are expanded, truncated, and how they are combined), filters used, and the number of records retrieved.  
 194 Additionally, a source will be provided for each publication identified through manual search (i.e., journal  
 195 name, website, conference proceedings, etc.).

196

197 **Table 1. Eligibility criteria for the scoping review**

| Item         | Inclusion criteria                                                                                                                                              | Exclusion criteria                                                                                                                                        |
|--------------|-----------------------------------------------------------------------------------------------------------------------------------------------------------------|-----------------------------------------------------------------------------------------------------------------------------------------------------------|
| Participants | Studies involving adolescents (10–19 years old)                                                                                                                 | Studies involving children <10 years of age or adults (>19 years of age)                                                                                  |
| Concept      | Studies involving one or more of the following interventions: nutrient supplementation interventions including vitamin and nutrient supplementation, deworming, | Interventions targeted towards individuals with specific medical conditions such as treatments intended for underweight, overweight, or obese adolescents |

|                  |                                                                                                                                                                                                                                                                                                                                                                                                                                                                                                                                                                                        |                                                                                                                                                                                 |
|------------------|----------------------------------------------------------------------------------------------------------------------------------------------------------------------------------------------------------------------------------------------------------------------------------------------------------------------------------------------------------------------------------------------------------------------------------------------------------------------------------------------------------------------------------------------------------------------------------------|---------------------------------------------------------------------------------------------------------------------------------------------------------------------------------|
|                  | <p>complementary feeding, nutrition education, physical education, promoting healthy diets and/or physical activity, nutrition policies, community/home garden, water, sanitation and hygiene interventions, community environment interventions, and structural interventions such as sweetened beverage tax, soda tax, and sugary drink tax.</p> <p>Studies that compared the intervention with any relevant control group including comparisons with no intervention, regular nutrition education and/or physical education, or any other intervention in the community setting</p> |                                                                                                                                                                                 |
| Context          | Community settings in low- and middle-income countries                                                                                                                                                                                                                                                                                                                                                                                                                                                                                                                                 | Interventions applied exclusively in the school setting                                                                                                                         |
| Types of sources | Randomized controlled trials, quasi-experimental studies including controlled before-after studies                                                                                                                                                                                                                                                                                                                                                                                                                                                                                     | Non-randomized trials including controlled before-after studies that did not account for baseline differences, observational studies including cohort, case-control, and cross- |

|  |  |                                                                              |
|--|--|------------------------------------------------------------------------------|
|  |  | sectional designs, and editorial commentaries, opinions, and review articles |
|--|--|------------------------------------------------------------------------------|

198

199 **Eligibility**

200 The inclusion and exclusion criteria for this scoping review are listed below.

201 ***Inclusion criteria***

202 We will include the following studies.

- 203 • Randomized controlled trials (RCT), with the intervention randomized to individuals or in clusters  
204 (including clubs, groups, communities, villages, homes, etc.), and quasi-experimental studies  
205 including controlled before-after studies that have reported interventions to address any form of  
206 adolescent malnutrition when compared to a control group.
- 207 • Studies involving adolescent boys and/or girls aged 10-19 years, based on the WHO definition of  
208 adolescents (18).
- 209 • Studies conducted in LMICs—as defined by the World Bank in the year 2023 (19).
- 210 • Studies involving interventions for one or more of the following: micronutrient supplementation,  
211 feeding interventions, nutrition education, physical education, interventions to promote healthy  
212 diets, interventions promoting physical activity, community and/or home gardens, food and  
213 nutrition policies, community environment interventions, water sanitation and hygiene (WASH)  
214 interventions, and structural interventions such as taxation of sweetened-sugary drinks.
- 215 • The control (comparison) in each included study can be participants who did not receive any  
216 intervention or received standard care, received standard health/nutrition education, or any other  
217 intervention in the community setting.
- 218 • Published articles as well as unpublished and grey literature and will include ongoing studies where  
219 preliminary findings are available.
- 220 • We will not place any restrictions on the language, sample size, or duration of the intervention.

1  
2  
3 221 ***Exclusion criteria***  
4

5 222 We will not consider the following studies.  
6

- 7 223 • Non-RCTs that are not quasi-experimental studies with comparator groups and controlled before-  
8  
9 224 after studies that did not account for the baseline differences between the study arms.  
10  
11 225 • Observational studies such as cohort, case-control, and cross-sectional designs.  
12  
13 226 • Editorials, commentaries, opinions, and review articles. However, we will use review articles to  
14 227 identify additional original articles.  
15  
16 228 • Studies that were conducted in the school setting and clinical interventions targeted individuals  
17  
18 229 with specific medical conditions such as programs intended for underweight, overweight, obese, or  
19  
20 230 anemic adolescents.  
21  
22  
23

24 231

25  
26 232 **Data management**  
27

28 233 The records will be imported into Covidence (Veritas Health Innovation, Melbourne, Australia), an  
29  
30 234 Internet-based systematic review management program. Detection and removal of duplicates, title and  
31  
32 235 abstract screening, and full-text screening will be performed by using Covidence.  
33  
34

35 236

36  
37 237 **Selection of studies**  
38

39 238 Using Covidence, we will screen titles, abstracts, and full texts. First, two reviewers will independently  
40  
41 239 assess all search results (i.e., titles and abstracts) and exclude irrelevant studies based on inclusion and  
42  
43 240 exclusion criteria. Next, two reviewers will carry out the full-text screening based on the same  
44  
45 241 inclusion/exclusion criteria. The reviewers will discuss and resolve any difference of opinion or, if  
46  
47 242 necessary, seek a third reviewer's opinion for resolving differences. A study flow diagram stating the  
48  
49 243 specific reasons for exclusion will be maintained following the PRISMA for Scoping Review statement  
50  
51 244 (PRISMA-ScR) (20).  
52

53  
54 245  
55  
56  
57  
58  
59  
60



## 246 **Data extraction**

247 Two reviewers will independently extract and enter data from studies included in the review. We will  
248 develop and test an extraction form on five randomly selected studies. We will extract the following  
249 information.

- 250 • Study details including the title, authors (first author and corresponding author), the corresponding  
251 author's contact information, journal (or source for unpublished reports), calendar year of  
252 publication, calendar year of intervention, country, and source of funding.
- 253 • Study methods including objectives and/or research questions, type of study, investigation  
254 strategies, settings, sample size, and sample characteristics (e.g., age, sex, socioeconomic status
- 255 • Intervention strategy including target population, delivery platform and providers (including  
256 selection, training, supervision, support, and incentivization), types of nutrition and other  
257 interventions (including content, conceptual framework and/or theoretical underpinnings, timing,  
258 duration, and dosage or frequency), and comparator/control.
- 259 • Outcomes assessed and details of the measures used.
- 260 • Findings including the coverage of services, facilitators and barriers to intervention delivery and  
261 uptake, effectiveness findings with point estimates and measures of variance (standard errors, 95%  
262 confidence intervals, or *p*-values), and any other key findings related to the scoping review  
263 questions.

264  
265 We will contact the corresponding author via email if there is missing or inconsistent information. We will  
266 contact the author two times at most. The available data will be analyzed and any gaps due to missing data  
267 will be discussed if the data issue cannot be resolved after contacting the authors. The extraction form  
268 template was provided in **Supplementary File 2**.

269

## 270 **Risk of bias assessment**

1  
2  
3 271 As scoping reviews are exploratory in nature, risk of bias assessments are not typically required as part of  
4  
5 272 the guidelines for scoping reviews (17). However, we plan to assess the risk of bias among studies with an  
6  
7 273 available quantitative measure as a preliminary way of contextualizing the reported measures of impact on  
8  
9 274 the outcomes reported. For the assessment of the risk of bias in the selected studies, we will use the  
10  
11 275 Cochrane Collaboration's revised tool for assessing the risk of bias in randomized trials (RoB 2) (21). Two  
12  
13 276 reviewers will independently evaluate methodological quality. Any uncertainties or disagreements will be  
14  
15 277 resolved by discussion or by a third reviewer, whenever needed. The tool is a domain-based evaluation, in  
16  
17 278 which critical assessments for risk of bias are made separately for various domains, including the  
18  
19 279 randomization process, deviation from intended interventions, missing outcome data, measurement of the  
20  
21 280 outcome, and selective outcome reporting. The risk of bias in clustered trials will be similarly assessed  
22  
23 281 using the risk of bias 2 for cluster-randomized trials (RoB 2 CRT) (22). Additionally, we will use the Risk  
24  
25 282 of Bias in Non-randomized Studies of Interventions (ROBINS-I) tool (23), to assess the risk of bias for  
26  
27 283 controlled before-after studies and non-randomized controlled trials.  
28  
29  
30  
31 284

### 32 285 **Synthesis of evidence**

34 286 All included studies will be systematically synthesized in the text and a table following the SWiM  
35  
36 287 guidelines (Synthesis Without Meta-analysis) (24). In this synthesis, we will describe how many sources  
37  
38 288 of evidence were screened, assessed for eligibility, and included in the review, along with reasons for  
39  
40 289 exclusion at each stage. Our presentation of included sources of evidence will include summary  
41  
42 290 characteristics and citations, as well as a critical appraisal, if applicable. Studies will be grouped based on  
43  
44 291 methods and interventions, standardized outcomes metrics, synthesis methods, criteria used to prioritize  
45  
46 292 results for summary, reporting of results, the certainty of results, heterogeneity in effects, as well as barriers  
47  
48 293 and facilitators to delivering the interventions will be discussed. For continuous outcomes, effect estimates  
49  
50 294 will be expressed as mean differences (with 95% confidence intervals) between the intervention group and  
51  
52 295 the control group; for dichotomous outcomes, effect estimates will be expressed as risk ratios, rate ratios,  
53  
54 296 hazard ratios, or odds ratios (all with a 95% confidence interval). Additionally, we will discuss the  
55  
56  
57  
58  
59  
60

1  
2  
3 297 limitations of the review process and provide an interpretation of the results concerning the objectives of  
4  
5 298 the review, as well as possible implications or next steps. We will follow the PRISMA Extension for  
6  
7 299 Scoping Reviews (PRISMA-ScR) checklist and guidelines to ensure a robust and replicable process (20).  
8  
9  
10 300

### 11 301 **Registration and reporting**

12  
13 302 The final protocol was registered prospectively with the Open Science Framework (<https://osf.io/t2d78>) on  
14  
15 303 July 19, 2023, based on the PRISMA Extension for Scoping Reviews (PRISMA-ScR) (20). In the event of  
16  
17 304 protocol amendments, the date of each amendment will be accompanied by a description of each change  
18  
19 305 and the rationale on the Open Science Forum.  
20  
21

22 306

### 23 24 307 **Ethics and dissemination**

25  
26 308 This study is a scoping review that does not require ethics approval because it involves a methodical  
27  
28 309 presentation of available resources. The protocol aims to provide an overview of the broad literature on  
29  
30 310 community-based interventions targeting multiple forms of malnutrition among adolescents in LMICs. We  
31  
32 311 anticipate that the findings of this review will be disseminated through publications in peer-reviewed  
33  
34 312 journals, and presentations at international and regional conferences and stakeholder meetings targeting  
35  
36 313 researchers, adolescents, policymakers, and governments in LMICs. Additionally, the submitted review  
37  
38 314 will help identify effective interventions, determine gaps and disparities among interventions, and provide  
39  
40 315 insight for policymakers to develop and design as well as implement future programs.  
41  
42

43 316

### 44 45 317 **Patient and public involvement**

46  
47 318 None. This work analyses existing research studies, and therefore, involves no patients or members of the  
48  
49 319 public.  
50

### 51 320 **Author Contributors**

52  
53 321 SS conceived the idea, developed the methods, and wrote the first draft of the manuscript. ALK, MR, UP,  
54  
55 322 and EF contributed to the methods and supported the drafting and editing of the manuscript. ALK and MR  
56  
57

1  
2  
3 323 contributed meaningfully to the design of the search strategy. SO, NM, DOA, CN, SL, TB, WWF, and  
4  
5 324 ARISE-NUTRINT study collaborators supervised and reviewed the protocol. All authors revised and  
6  
7 325 approved the final manuscript.  
8

9  
10 326 **Funding**

11 327 This study was funded by the European Union Horizon 2022. Views and opinions expressed are however  
12  
13 328 those of the author(s) only and do not necessarily reflect those of the European Union. Neither the European  
14  
15 329 Union nor the granting authority can be held responsible for them.  
16

17  
18 330 **Competing interests**

19  
20 331 None declared.  
21

22 332 **Patient consent for publication**

23  
24 333 Not required  
25

26 334 **Provenance and peer review**

27  
28 335 Not commissioned, externally peer-reviewed  
29  
30  
31 336

32  
33 337 **References**

- 34  
35 338 1. United Nations Children's Fund. Progress for Children: A Report Card on Adolescents No. 10.  
36  
37 339 2012. Available at [www.unicef.org/publications/files/Progress\\_for\\_Children\\_-](http://www.unicef.org/publications/files/Progress_for_Children_-_No._10_EN_04272012.pdf)  
38  
39 340 [\\_No.\\_10\\_EN\\_04272012.pdf](http://www.unicef.org/publications/files/Progress_for_Children_-_No._10_EN_04272012.pdf).  
40  
41 341 2. United Nations. Department of Economic and Social Affairs, Population Division. World  
42  
43 342 population prospects, the 2012 revision. Available at: <https://population.un.org/wpp/>  
44  
45 343 3. Patton GC, Sawyer SM, Santelli JS, et al. Our future: a Lancet commission on adolescent health  
46  
47  
48 344 and well-being. *Lancet* 2016;387:2423-78.  
49  
50  
51 345 4. Patton GC, Olsson C, Skirbekk V, et al. Adolescence and the next generation. *Nature* 2018;554:  
52  
53  
54  
55 346 458-66.  
56  
57  
58  
59  
60

- 1  
2  
3  
4 347 5. Canavan CR, Fawzi WW. Addressing knowledge gaps in adolescent nutrition: Towards advancing  
5  
6  
7 348 public health and sustainable development. *Curr Dev Nutr* 2019;3:nzz062.  
8  
9  
10 349 6. World Health Organization. Global health estimates: leading causes of DALYs. Available at:  
11  
12  
13 350 [https://www.who.int/data/gho/data/themes/mortality-and-global-health-estimates/global-health-](https://www.who.int/data/gho/data/themes/mortality-and-global-health-estimates/global-health-estimates-leading-causes-of-dalys)  
14  
15  
16 351 [estimates-leading-causes-of-dalys](https://www.who.int/data/gho/data/themes/mortality-and-global-health-estimates/global-health-estimates-leading-causes-of-dalys)  
17  
18  
19 352 7. Norris SA, Frongillo EA, Black MM, et al. Nutrition in adolescent growth and development. *Lancet*  
20  
21  
22 353 2022;299:172-84.  
23  
24  
25 354 8. Martin-Shields CP, Stojetz W. Food security and conflict: Empirical challenges and future  
26  
27 355 opportunities for research and policy making on food security and conflict. *World development*  
28  
29 356 2019;119:150-64.  
30  
31 357 9. Salam RA, Hooda M, Das JK, et al. Interventions to Improve Adolescent Nutrition: A Systematic  
32  
33  
34 358 Review and Meta-Analysis. *J Adolesc Health* 2016;59:S29-S39.  
35  
36  
37 359 10. Lassi ZS, Moin A, Das JK, et al. Systematic review on evidence-based adolescent nutrition  
38  
39  
40 360 interventions. *Ann N Y Acad Sci* 2017;1393:34-50.  
41  
42  
43 361 11. Roche ML, Samson KLI, Green TJ, et al. Perspective: Weekly Iron and Folic Acid  
44  
45  
46 362 Supplementation (WIFAS): A critical review and rationale for inclusion in the essential medicines  
47  
48  
49 363 list to accelerate anemia and neural tube defects reduction. *Adv Nutr* 2021;12:334-42.  
50  
51  
52  
53  
54  
55  
56  
57  
58  
59  
60

- 1  
2  
3  
4 364 12. Shinde S, Wang D, Moulton GE, et al. School-based health and nutrition interventions addressing  
5  
6 365 double burden of malnutrition and educational outcomes of adolescents in low- and middle-income  
7  
8  
9 366 countries: A systematic review. *Matern Child Nutr* 2023:e13437.
- 11  
12 367 13. Kyere P, Veerman JL, Lee P, et al. Effectiveness of school-based nutrition interventions in sub-  
13  
14 368 Saharan Africa: a systematic review. *Public Health Nutr* 2020;23:2626-36.
- 16 369 14. Van Cauwenberghe E, Maes L, Spittaels H, et al. Effectiveness of school-based interventions in  
17  
18 370 Europe to promote healthy nutrition in children and adolescents: systematic review of published  
19  
20 371 and 'grey' literature. *Br J Nutr* 2010;103:781-97.
- 22  
23 372 15. Pongutta S, Ajetunmobi O, Davey C, et al. Impacts of school nutrition interventions on the  
24  
25 373 nutritional status of school-aged children in Asia: A systematic review and meta-analysis. *Nutrients*  
26  
27 374 2022;14:589. doi: 10.3390/nu14030589.
- 28  
29 375 16. Hawkes C, Ruel M, Salm L, et al. Double-duty actions: seizing programme and policy opportunities  
30  
31 376 to address malnutrition in all its forms. *Lancet* 2019;395:142-55.
- 32  
33  
34  
35 377 17. Munn Z, Peters MDJ, Stern C, et al. Systematic review or scoping review? Guidance for authors  
36  
37 378 when choosing between a systematic or scoping review approach. *BMC Med Res Methodol* 2018  
38  
39 379 19;18:143.
- 40  
41 380 18. Singh JA, Siddiqi M, Parameshwar P, et al. World Health Organization Guidance on Ethical  
42  
43 381 Considerations in Planning and Reviewing Research Studies on Sexual and Reproductive Health  
44  
45 382 in Adolescents. *J Adolesc Health* 2019;64:427-29.
- 46  
47  
48 383 19. World Bank designated developing countries 2023. World bank. Available at:  
49  
50  
51 384 <https://www.endocrine.org/membership/join/developing-country-list>
- 52  
53  
54  
55  
56  
57  
58  
59  
60

- 1  
2  
3  
4 385 20. Tricco AC, Lillie E, Zarin W, et al. PRISMA Extension for Scoping Reviews (PRISMA-ScR):  
5  
6 386 Checklist and Explanation. *Ann Intern Med* 2018;169:467-73.  
7  
8  
9 387 21. Sterne JAC, Savović J, Page MJ, et al. RoB 2: a revised tool for assessing the risk of bias in  
10  
11  
12 388 randomized trials. *BMJ* 2019;366:l4898.  
13  
14  
15 389 22. Eldridge S, Campbell M, Campbell M, et al. Revised Cochrane risk of bias tool for randomized trials  
16  
17  
18 390 (RoB 2.0) additional considerations for cluster randomized trials. Available at:  
19  
20  
21 391 [https://www.unisa.edu.au/contentassets/72bf75606a2b4abcaf7f17404af374ad/rob2-](https://www.unisa.edu.au/contentassets/72bf75606a2b4abcaf7f17404af374ad/rob2-0_cluster_parallel_guidance.pdf)  
22  
23  
24 392 [0\\_cluster\\_parallel\\_guidance.pdf](https://www.unisa.edu.au/contentassets/72bf75606a2b4abcaf7f17404af374ad/rob2-0_cluster_parallel_guidance.pdf)  
25  
26  
27 393 23. Sterne JA, Hernán MA, Reeves BC, et al. ROBINS-I: a tool for assessing the risk of bias in non-  
28  
29  
30 394 randomized studies of interventions. *BMJ* 2016;355: i4919.  
31  
32  
33 395 24. Campbell M, McKenzie JE, Sowden A, et al. Synthesis without meta-analysis (SWiM) in  
34  
35  
36 396 systematic reviews: reporting guideline. *BMJ* 2020;368:l6890.  
37  
38  
39  
40 397  
41  
42 398  
43  
44  
45  
46  
47  
48  
49  
50  
51  
52  
53  
54  
55  
56  
57  
58  
59  
60

Supplementary File 1. Search strategies in 3 different databases

| <b>Community-based interventions targeting multiple forms of malnutrition among adolescents in low- and middle-income countries: protocol for a scoping review</b> |                                                                                                                                                                                                                                                                                          |                                                                                                                                                                                                                                                                                                                                                                                                                                                                                                                                                                                                                                                                                                                                                                                                                                                                                                                                                                                                                                                                                   |                                                        |
|--------------------------------------------------------------------------------------------------------------------------------------------------------------------|------------------------------------------------------------------------------------------------------------------------------------------------------------------------------------------------------------------------------------------------------------------------------------------|-----------------------------------------------------------------------------------------------------------------------------------------------------------------------------------------------------------------------------------------------------------------------------------------------------------------------------------------------------------------------------------------------------------------------------------------------------------------------------------------------------------------------------------------------------------------------------------------------------------------------------------------------------------------------------------------------------------------------------------------------------------------------------------------------------------------------------------------------------------------------------------------------------------------------------------------------------------------------------------------------------------------------------------------------------------------------------------|--------------------------------------------------------|
| <b>No.</b>                                                                                                                                                         | <b>Concept</b>                                                                                                                                                                                                                                                                           | <b>PubMed search terms</b>                                                                                                                                                                                                                                                                                                                                                                                                                                                                                                                                                                                                                                                                                                                                                                                                                                                                                                                                                                                                                                                        | <b>Number of records (As per 14<sup>th</sup> July)</b> |
| #1                                                                                                                                                                 | <b>Randomized controlled trial<br/>Controlled before-after studies<br/>Quasi experimental studies</b>                                                                                                                                                                                    | ("randomized controlled trial"[pt] OR "random allocation"[mesh] OR "cross-over studies"[mesh] OR "Controlled Before-After Studies"[Mesh] OR quasi experiment*[tiab] OR quasiexperiment*[tiab] OR "quasi-experiment*"[tiab])                                                                                                                                                                                                                                                                                                                                                                                                                                                                                                                                                                                                                                                                                                                                                                                                                                                       | 720,799<br>556,703 (2000-2023)                         |
| #2                                                                                                                                                                 | <b>Nutrition and health interventions</b><br>(dietary supplements, healthy diet, healthy eating, healthy nutrition, weight control, weight management, micronutrient supplementation diet/nutrition education, physical activity, community/home garden, and WASH, and nutrition policy) | ("Health Education"[Mesh:NoExp] OR "Health Promotion"[Mesh]) OR ("Adolescent Health Services"[Mesh] OR "Preventive Health Services"[Mesh:NoExp]) OR (preventive health[tiab]) OR ("Dietary Supplements"[Mesh] OR dietary supplement*[tiab] micronutrient supplement*[tiab] OR folic acid supplement*[tiab] OR MMN[tiab] OR nutrient supplement*[tiab] OR nutritional supplement*[tiab]) OR ("Diet, Healthy"[Mesh] OR healthy diet*[tiab] OR healthy eating[tiab] OR healthy food*[tiab] OR diet education[tiab] OR dietary education[tiab] OR dietary intervention[tiab] OR healthy eating[tiab] OR healthy food*[tiab] OR healthy diet*[tiab] OR healthy nutrition*[tiab] OR nutrition counsel*[tiab] OR nutritional counsel*[tiab]) OR (nutrition education[tiab] OR nutrition intervention[tiab] OR nutritional education[tiab] OR nutritional intervention[tiab]) OR ("exercise"[MeSH] OR "exercise" [tiab] OR "physical activity"[tiab] OR fitness*[tiab] OR sport*[tiab]) OR ("nutrition policy"[MeSH] OR "nutrition"[tiab] AND "policy"[tiab] OR "nutrition policy"[tiab]) | 865,050<br>687,256 (2000-2023)                         |
| #3                                                                                                                                                                 | <b>Adolescents</b>                                                                                                                                                                                                                                                                       | ("Adolescent"[Mesh] OR adolescent[tiab] OR adolescents[tiab] OR adolescence[tiab] OR teen[tiab] OR teens[tiab] OR teenage*[tiab])                                                                                                                                                                                                                                                                                                                                                                                                                                                                                                                                                                                                                                                                                                                                                                                                                                                                                                                                                 | 2,310,507<br>1,421,658 (2000-2023)                     |
| #4                                                                                                                                                                 | <b>Low- and middle-income countries</b>                                                                                                                                                                                                                                                  | (Afghanistan*[tiab] OR Albania*[tiab] OR Algeria*[tiab] OR Samoa*[tiab] OR Angola*[tiab] OR Armenia*[tiab] OR Azerbaijan*[tiab] OR Bangladesh*[tiab] OR Bengali[tiab] OR Belarus*[tiab] OR Belize[tiab] OR Benin[tiab] OR Bhutan*[tiab] OR Bolivia*[tiab] OR Bosnia*[tiab] OR Herzegovina*[tiab] OR Botswana*[tiab] OR Brazil*[tiab] OR Bulgaria*[tiab] OR "Burkina Faso"[tiab] OR Burkinabe[tiab] OR Burundi*[tiab] OR "Cabo Verd*"[tiab] OR "Cape                                                                                                                                                                                                                                                                                                                                                                                                                                                                                                                                                                                                                               | 1,931,426<br>1,565,369 (2000-2023)                     |



|                                     |                                                                                                                                                                                                                                                                                                                                                                                                                                                                                                                                                                                                                                                                                                                                                                                                                                                                                                                                                                                                                                                                                                                                                                                                                                                                                                                                                                                                                                                                                                                                                                                                                                                                                                                                                                                                                                                                                                                                                                                                                                                                                                                                                                                                                                                                                                                                                                                                                                                                                                                                                             |                                     |
|-------------------------------------|-------------------------------------------------------------------------------------------------------------------------------------------------------------------------------------------------------------------------------------------------------------------------------------------------------------------------------------------------------------------------------------------------------------------------------------------------------------------------------------------------------------------------------------------------------------------------------------------------------------------------------------------------------------------------------------------------------------------------------------------------------------------------------------------------------------------------------------------------------------------------------------------------------------------------------------------------------------------------------------------------------------------------------------------------------------------------------------------------------------------------------------------------------------------------------------------------------------------------------------------------------------------------------------------------------------------------------------------------------------------------------------------------------------------------------------------------------------------------------------------------------------------------------------------------------------------------------------------------------------------------------------------------------------------------------------------------------------------------------------------------------------------------------------------------------------------------------------------------------------------------------------------------------------------------------------------------------------------------------------------------------------------------------------------------------------------------------------------------------------------------------------------------------------------------------------------------------------------------------------------------------------------------------------------------------------------------------------------------------------------------------------------------------------------------------------------------------------------------------------------------------------------------------------------------------------|-------------------------------------|
|                                     | <p>Verd*[tiab] OR Cambodia*[tiab] OR Cameroon*[tiab] OR “Central African”*[tiab] OR Chad*[tiab] OR China[tiab] OR Chinese[tiab] OR Colombia*[tiab] OR Comoros[tiab] OR Congo[tiab] OR “Costa Rica”*[tiab] OR “Cote d’Ivoire”[tiab] OR “Ivory Coast”[tiab] OR Cuba[tiab] OR Cuban[tiab] OR Djibouti[tiab] OR Dominica*[tiab] OR Ecuador[tiab] OR Egypt*[tiab] OR “El Salvador”*[tiab] OR Eritrea*[tiab] OR Ethiopia*[tiab] OR Fiji*[tiab] OR Gabon*[tiab] OR Gambia*[tiab] OR Georgia*[tiab] OR Ghana*[tiab] OR Grenada*[tiab] OR Guatemala*[tiab] OR Guinea*[tiab] OR Guyan*[tiab] OR Haiti*[tiab] OR Hondura*[tiab] OR India[tiab] OR Indian*[tiab] OR Indonesia*[tiab] OR Iran*[tiab] OR Iraq*[tiab] OR Jamaica*[tiab] OR Jordan*[tiab] OR Kazakh*[tiab] OR Kenya*[tiab] OR Kiribati[tiab] OR “People’s Republic of Korea”[tiab] OR “North Korea”[tiab] OR Kosovo[tiab] OR Kosovar*[tiab] OR Kyrgyz*[tiab] OR Lao[tiab] OR Laos[tiab] OR Laotian*[tiab] OR Lebanon[tiab] OR Lebanes*[tiab] OR Lesotho[tiab] OR Liberia*[tiab] OR Libya*[tiab] OR Macedonia*[tiab] OR Madagascar*[tiab] OR Malawi*[tiab] OR Malaysia*[tiab] OR Maldives[tiab] OR Mali[tiab] OR “Marshall Island”*[tiab] OR “Mexico”[MeSH] OR Mexico[tiab] OR Mexican*[tiab] OR Micronesia*[tiab] OR Moldova*[tiab] OR Mongolia*[tiab] OR Montenegr*[tiab] OR Morocc*[tiab] OR Mozambique[tiab] OR Myanmar[tiab] OR Burmese*[tiab] OR Burma[tiab] OR Namibia*[tiab] OR Nepal*[tiab] OR Nicaragua*[tiab] OR Niger*[tiab] OR Pakistan*[tiab] OR Paraguay*[tiab] OR Peru*[tiab] OR Philippin*[tiab] OR Rwanda*[tiab] OR “Sao Tome”[tiab] OR Principe[tiab] OR Senegal*[tiab] OR Serbia*[tiab] OR “Sierra Leone”*[tiab] OR “Solomon Island”*[tiab] OR Somalia*[tiab] OR “South Africa”*[tiab] OR “Sri Lanka”[tiab] OR “St Lucia”[tiab] OR “Saint Lucia”[tiab] OR “St Vincent”[tiab] OR “Saint Vincent”[tiab] OR Grenad*[tiab] OR Sudan*[tiab] OR Suriname*[tiab] OR Swaziland*[tiab] OR Eswatini*[tiab] OR Syria*[tiab] OR Tajik*[tiab] OR Tanzania*[tiab] OR Zanzibar[tiab] OR Thai*[tiab] OR Timor*[tiab] OR Togo*[tiab] OR Tonga*[tiab] OR Tunisia*[tiab] OR Turkey[tiab] OR Turkish[tiab] OR Turkmen*[tiab] OR Tuvalu*[tiab] OR Uganda*[tiab] OR Ukrain*[tiab] OR Uzbeki*[tiab] OR Vanuatu*[tiab] OR Venezuela*[tiab] OR Vietnam*[tiab] OR “Viet nam”*[tiab] OR “West Bank”[tiab] OR Gaza*[tiab] OR Palestin*[tiab] OR Yemen*[tiab] OR Zambia*[tiab] OR Zimbabw*[tiab] OR “Western Sahara”[tiab] OR Argentin*[tiab] OR Russia*[tiab] OR Maurit*[tiab] OR Palau[tiab] OR Romania*[tiab])</p> |                                     |
| <p>#1 AND # 2 AND #3<br/>AND #4</p> |                                                                                                                                                                                                                                                                                                                                                                                                                                                                                                                                                                                                                                                                                                                                                                                                                                                                                                                                                                                                                                                                                                                                                                                                                                                                                                                                                                                                                                                                                                                                                                                                                                                                                                                                                                                                                                                                                                                                                                                                                                                                                                                                                                                                                                                                                                                                                                                                                                                                                                                                                             | <p>10,670<br/>9,869 (2000-2023)</p> |

| No. | Concept                                                                                                                                                                                                                                                                                  | EMBASE search terms                                                                                                                                                                                                                                                                                                                                                                                                                                                                                                                                                                                                                                                                                                                                                                                                                                                                                                                                                                                                                    | Number of records<br>(As per 14 <sup>th</sup> July) |
|-----|------------------------------------------------------------------------------------------------------------------------------------------------------------------------------------------------------------------------------------------------------------------------------------------|----------------------------------------------------------------------------------------------------------------------------------------------------------------------------------------------------------------------------------------------------------------------------------------------------------------------------------------------------------------------------------------------------------------------------------------------------------------------------------------------------------------------------------------------------------------------------------------------------------------------------------------------------------------------------------------------------------------------------------------------------------------------------------------------------------------------------------------------------------------------------------------------------------------------------------------------------------------------------------------------------------------------------------------|-----------------------------------------------------|
| #1  | <b>Randomized controlled trial</b><br><b>Controlled before-after studies</b><br><b>Quasi experimental studies</b>                                                                                                                                                                        | ('randomized controlled trial':af OR 'randomization'/exp OR 'crossover procedure'/exp OR 'epidemiology'/exp OR quasi experiment*:ti,ab OR quasiexperiment*:ti,ab OR 'quasi-experiment*':ti,ab)                                                                                                                                                                                                                                                                                                                                                                                                                                                                                                                                                                                                                                                                                                                                                                                                                                         | 146,384<br>131,436 (2000-2023)                      |
| #2  | <b>Nutrition and health interventions</b><br>(dietary supplements, healthy diet, healthy eating, healthy nutrition, weight control, weight management, micronutrient supplementation diet/nutrition education, physical activity, community/home garden, and WASH, and nutrition policy) | ('health education'/de OR 'health promotion'/exp) OR ('child health care'/exp OR 'preventive health service'/de) OR (preventive health:ti,ab) OR ('dietary supplement'/exp OR dietary supplement*:ti,ab micronutrient supplement*:ti,ab OR folic acid supplement*:ti,ab OR MMN:ti,ab OR nutrient supplement*:ti,ab OR nutritional supplement*:ti,ab) OR ('healthy diet'/exp OR healthy diet*:ti,ab OR healthy eating:ti,ab OR healthy food*:ti,ab OR diet education:ti,ab OR dietary education:ti,ab OR dietary intervention:ti,ab OR healthy eating:ti,ab OR healthy food*:ti,ab OR healthy diet*:ti,ab OR healthy nutrition*:ti,ab OR nutrition counsel*:ti,ab OR nutritional counsel*:ti,ab) OR (nutrition education:ti,ab OR nutrition intervention:ti,ab OR nutritional education:ti,ab OR nutritional intervention:ti,ab) OR ('exercise'/exp OR 'exercise':ti,ab OR 'physical activity':ti,ab OR fitness*:ti,ab OR sport*:ti,ab) OR ('nutrition policy'/exp OR 'nutrition':ti,ab AND 'policy':ti,ab OR 'nutrition policy':ti,ab) | 1,421,386<br>1,168,709 (2000-2023)                  |
| #3  | <b>Adolescents</b>                                                                                                                                                                                                                                                                       | ('adolescent'/exp OR adolescent:ti,ab OR adolescents:ti,ab OR adolescence:ti,ab OR teen:ti,ab OR teens:ti,ab OR teenage*:ti,ab)                                                                                                                                                                                                                                                                                                                                                                                                                                                                                                                                                                                                                                                                                                                                                                                                                                                                                                        | 2,031,554<br>1,398,667 (2000-2023)                  |
| #4  | <b>Low- and middle-income countries</b>                                                                                                                                                                                                                                                  | (Afghanistan*:ti,ab OR Albania*:ti,ab OR Algeria*:ti,ab OR Samoa*:ti,ab OR Angola*:ti,ab OR Armenia*:ti,ab OR Azerbaijan*:ti,ab OR Bangladesh*:ti,ab OR Bengali:ti,ab OR Belarus*:ti,ab OR Belize:ti,ab OR Benin:ti,ab OR Bhutan*:ti,ab OR Bolivia*:ti,ab OR Bosnia*:ti,ab OR Herzegovina*:ti,ab OR Botswana*:ti,ab OR Brazil*:ti,ab OR Bulgaria*:ti,ab OR 'Burkina Faso':ti,ab OR Burkinabe:ti,ab OR Burundi*:ti,ab OR 'Cabo Verd*':ti,ab OR 'Cape Verd*':ti,ab OR Cambodia*:ti,ab OR Cameroon*:ti,ab OR 'Central African*':ti,ab OR Chad*:ti,ab OR China:ti,ab OR Chinese:ti,ab OR Colombia*:ti,ab OR Comoros:ti,ab OR Congo:ti,ab OR 'Costa Rica*':ti,ab OR 'cote d'ivoire':ti,ab OR 'Ivory Coast':ti,ab OR Cuba:ti,ab OR Cuban:ti,ab OR Djibouti:ti,ab OR Dominica*:ti,ab OR Ecuador:ti,ab OR Egypt*:ti,ab OR 'El Salvador*':ti,ab OR Eritrea*:ti,ab OR Ethiopia*:ti,ab OR Fiji*:ti,ab OR Gabon*:ti,ab OR Gambia*:ti,ab OR Georgia*:ti,ab OR Ghana*:ti,ab OR Grenada*:ti,ab OR Guatemala*:ti,ab OR Guinea*:ti,ab OR                | 2,466,552<br>2,047,567 (2000-2023)                  |

|  |                                            |                                                                                                                                                                                                                                                                                                                                                                                                                                                                                                                                                                                                                                                                                                                                                                                                                                                                                                                                                                                                                                                                                                                                                                                                                                                                                                                                                                                                                                                                                                                                                                                                                                                                                                                                                                                                                                                                                                                                                                                          |                                                  |
|--|--------------------------------------------|------------------------------------------------------------------------------------------------------------------------------------------------------------------------------------------------------------------------------------------------------------------------------------------------------------------------------------------------------------------------------------------------------------------------------------------------------------------------------------------------------------------------------------------------------------------------------------------------------------------------------------------------------------------------------------------------------------------------------------------------------------------------------------------------------------------------------------------------------------------------------------------------------------------------------------------------------------------------------------------------------------------------------------------------------------------------------------------------------------------------------------------------------------------------------------------------------------------------------------------------------------------------------------------------------------------------------------------------------------------------------------------------------------------------------------------------------------------------------------------------------------------------------------------------------------------------------------------------------------------------------------------------------------------------------------------------------------------------------------------------------------------------------------------------------------------------------------------------------------------------------------------------------------------------------------------------------------------------------------------|--------------------------------------------------|
|  |                                            | <p>Guyan*:ti,ab OR Haiti*:ti,ab OR Hondura*:ti,ab OR India:ti,ab OR Indian*:ti,ab OR Indonesia*:ti,ab OR Iran*:ti,ab OR Iraq*:ti,ab OR Jamaica*:ti,ab OR Jordan*:ti,ab OR Kazakh*:ti,ab OR Kenya*:ti,ab OR Kiribati:ti,ab OR ‘People’s Republic of Korea’:ti,ab OR ‘North Korea’:ti,ab OR Kosovo:ti,ab OR Kosovar*:ti,ab OR Kyrgyz*:ti,ab OR Lao:ti,ab OR Laos:ti,ab OR Laotian*:ti,ab OR Lebanon:ti,ab OR Lebanes*:ti,ab OR Lesotho:ti,ab OR Liberia*:ti,ab OR Libya*:ti,ab OR Macedonia*:ti,ab OR Madagascar*:ti,ab OR Malawi*:ti,ab OR Malaysia*:ti,ab OR Maldives:ti,ab OR Mali:ti,ab OR ‘Marshall Island*’:ti,ab OR ‘Mexico’/exp OR Mexico:ti,ab OR Mexican*:ti,ab OR Micronesia*:ti,ab OR Moldova*:ti,ab OR Mongolia*:ti,ab OR Montenegr*:ti,ab OR Morocco*:ti,ab OR Mozambique:ti,ab OR Myanmar:ti,ab OR Burmese*:ti,ab OR Burma:ti,ab OR Namibia*:ti,ab OR Nepal*:ti,ab OR Nicaragua*:ti,ab OR Niger*:ti,ab OR Pakistan*:ti,ab OR Paraguay*:ti,ab OR Peru*:ti,ab OR Philippin*:ti,ab OR Rwanda*:ti,ab OR ‘Sao Tome’*:ti,ab OR Principe:ti,ab OR Senegal*:ti,ab OR Serbia*:ti,ab OR ‘Sierra Leone*’:ti,ab OR ‘Solomon Island*’:ti,ab OR Somalia*:ti,ab OR ‘South Africa*’:ti,ab OR ‘Sri Lanka’:ti,ab OR ‘St Lucia’:ti,ab OR ‘Saint Lucia’:ti,ab OR ‘St Vincent’:ti,ab OR ‘Saint Vincent’:ti,ab OR Grenad*:ti,ab OR Sudan*:ti,ab OR Suriname*:ti,ab OR Swaziland*:ti,ab OR Eswatini*:ti,ab OR Syria*:ti,ab OR Tajik*:ti,ab OR Tanzania*:ti,ab OR Zanzibar:ti,ab OR Thai*:ti,ab OR Timor*:ti,ab OR Togo*:ti,ab OR Tonga*:ti,ab OR Tunisia*:ti,ab OR Turkey:ti,ab OR Turkish:ti,ab OR Turkmen*:ti,ab OR Tuvalu*:ti,ab OR Uganda*:ti,ab OR Ukrain*:ti,ab OR Uzbeki*:ti,ab OR Vanuatu*:ti,ab OR Venezuela*:ti,ab OR Vietnam*:ti,ab OR ‘Viet nam*’:ti,ab OR ‘West Bank’:ti,ab OR Gaza*:ti,ab OR Palestin*:ti,ab OR Yemen*:ti,ab OR Zambia*:ti,ab OR Zimbabw*:ti,ab OR ‘Western Sahara’:ti,ab OR Argentin*:ti,ab OR Russia*:ti,ab OR Maurit*:ti,ab OR Palau:ti,ab OR Romania*:ti,ab)</p> |                                                  |
|  | <p><b>#1 AND # 2 AND #3<br/>AND #4</b></p> |                                                                                                                                                                                                                                                                                                                                                                                                                                                                                                                                                                                                                                                                                                                                                                                                                                                                                                                                                                                                                                                                                                                                                                                                                                                                                                                                                                                                                                                                                                                                                                                                                                                                                                                                                                                                                                                                                                                                                                                          | <p><b>17,874<br/>16,942 (2000-<br/>2023)</b></p> |

Review only

1  
2  
3  
4  
5  
6  
7  
8  
9  
10  
11  
12  
13  
14  
15  
16  
17  
18  
19  
20  
21  
22  
23  
24  
25  
26  
27  
28  
29  
30  
31  
32  
33  
34  
35  
36  
37  
38  
39  
40  
41  
42  
43  
44  
45  
46

| No. | Concept                                                                                                                                                                                                                                                                                                                     | Cochrane search terms                                                                                                                                                                                                                                                                                                                                                                                                                                                                                                                                                                                                                                                                                                                                                                                                                                                                                                                                                                                                                                                                                     | Number of records<br>(As of July 14 <sup>th</sup> 2023) |
|-----|-----------------------------------------------------------------------------------------------------------------------------------------------------------------------------------------------------------------------------------------------------------------------------------------------------------------------------|-----------------------------------------------------------------------------------------------------------------------------------------------------------------------------------------------------------------------------------------------------------------------------------------------------------------------------------------------------------------------------------------------------------------------------------------------------------------------------------------------------------------------------------------------------------------------------------------------------------------------------------------------------------------------------------------------------------------------------------------------------------------------------------------------------------------------------------------------------------------------------------------------------------------------------------------------------------------------------------------------------------------------------------------------------------------------------------------------------------|---------------------------------------------------------|
| #1  | <b>Randomized controlled trial</b><br><b>Controlled before-after studies</b><br><b>Quasi experimental studies</b>                                                                                                                                                                                                           | #1 "randomized controlled trial"<br>#2 [mh "random allocation"]<br>#3 {OR #1-#2}<br>#4 [mh "cross-over studies"]<br>#5 [mh "Controlled Before-After Studies"]<br>#6 {OR #4-#5}<br>#7 (quasi NEXT experiment*):ti,ab<br>#8 quasiexperiment*:ti,ab<br>#9 (quasi-experiment*):ti,ab<br>#10 {OR #7-#9}                                                                                                                                                                                                                                                                                                                                                                                                                                                                                                                                                                                                                                                                                                                                                                                                        | 702,362<br>664,394<br>(2000-2023)                       |
| #2  | <b>Nutrition and health interventions</b><br>(Dietary supplements, healthy diet, healthy eating, healthy nutrition, overweight, anaemia, obesity, weight control, weight management, micronutrient supplementation diet/nutrition education, school meal, physical activity, school garden, and WASH, and nutrition policy) | #11 [mh ^"health education"] OR [mh "health promotion"]<br>#12 [mh "Adolescent Health Services"] OR [mh ^"Preventive Health Services"]<br>#13 [mh "Adolescent Health Services"]<br>#14 [mh ^"Preventive Health Services"]<br>#15 [mh "Dietary Supplements"] OR dietary supplement*:ti,ab OR micronutrient supplement*:ti,ab OR folic acid supplement*:ti,ab OR folic acid supplement*:ti,ab OR MMN:ti,ab OR nutrient supplement*:ti,ab OR nutritional supplement*:ti,ab<br>#16 [mh "Diet, Healthy"] OR healthy diet*:ti,ab OR healthy eating:ti,ab OR healthy food*:ti,ab OR diet education:ti,ab OR dietary education:ti,ab OR dietary intervention:ti,ab OR healthy nutrition*:ti,ab OR nutrition counsel*:ti,ab OR nutritional counsel*:ti,ab<br>#17 nutrition education:ti,ab OR nutrition intervention:ti,ab OR nutritional education:ti,ab OR nutritional intervention:ti,ab<br>#18 [mh exercise] OR exercise:ti,ab OR physical activity:ti,ab OR fitness*:ti,ab OR sport*:ti,ab<br>#19 [mh "nutrition policy"] OR nutrition:ti,ab AND policy:ti,ab OR "nutrition policy":ti,ab<br>#20 {OR #11-#19} | 237,951<br>222,406<br>(2000-2023)                       |
| #3  | <b>Adolescents</b>                                                                                                                                                                                                                                                                                                          | #21 [mh Adolescent] OR adolescent:ti,ab OR adolescents:ti,ab OR adolescence:ti,ab<br>#22 teen:ti,ab OR teens:ti,ab OR teenage*:ti,ab<br>#23 {OR #21-#22}                                                                                                                                                                                                                                                                                                                                                                                                                                                                                                                                                                                                                                                                                                                                                                                                                                                                                                                                                  | 146,504<br>115,839<br>(2000-2023)                       |
| #4  | <b>Low- and middle-income countries</b>                                                                                                                                                                                                                                                                                     | #24 (Afghanistan*):ti,ab OR (Albania*):ti,ab OR (Algeria*):ti,ab OR (Samoa*):ti,ab OR (Angola*):ti,ab<br>#25 (Armenia*):ti,ab OR (Azerbaijan*):ti,ab OR (Bangladesh*):ti,ab OR (Bengali):ti,ab OR (Belarus*):ti,ab<br>#26 (Belize):ti,ab OR (Benin):ti,ab OR (Bhutan*):ti,ab OR (Bolivia*):ti,ab OR (Bosnia*):ti,ab<br>#27 (Herzegovina*):ti,ab OR (Botswana*):ti,ab OR (Brazil*):ti,ab OR (Bulgaria*):ti,ab OR ("Burkina Faso"):ti,ab OR Burkinabe:ti,ab<br>#28 Burundi*:ti,ab OR (Cabo NEXT Verd*):ti,ab OR (Cape NEXT Verd*):ti,ab OR Cambodia*:ti,ab OR Cameroon*:ti,ab<br>#29 (Central African*):ti,ab OR (Chad*):ti,ab OR (China):ti,ab OR (Chinese):ti,ab OR (Colombia*):ti,ab                                                                                                                                                                                                                                                                                                                                                                                                                     | 128,522<br>124,301<br>(2000-2023)                       |

|  |                                     |                                                                                                                                                                                                                                                                                                                                                                                                                                                                                                                                                                                                                                                                                                                                                                                                                                                                                                                                                                                                                                                                                                                                                                                                                                                                                                                                                                                                                                                                                                                                                                                                                                                                                                                                                                                                                                                                                                                                                                                                                                                                                                                                                                                                                                                                                                                                                                                                                                                                                                                                                                                                                                                                                                                                                                    |                                        |
|--|-------------------------------------|--------------------------------------------------------------------------------------------------------------------------------------------------------------------------------------------------------------------------------------------------------------------------------------------------------------------------------------------------------------------------------------------------------------------------------------------------------------------------------------------------------------------------------------------------------------------------------------------------------------------------------------------------------------------------------------------------------------------------------------------------------------------------------------------------------------------------------------------------------------------------------------------------------------------------------------------------------------------------------------------------------------------------------------------------------------------------------------------------------------------------------------------------------------------------------------------------------------------------------------------------------------------------------------------------------------------------------------------------------------------------------------------------------------------------------------------------------------------------------------------------------------------------------------------------------------------------------------------------------------------------------------------------------------------------------------------------------------------------------------------------------------------------------------------------------------------------------------------------------------------------------------------------------------------------------------------------------------------------------------------------------------------------------------------------------------------------------------------------------------------------------------------------------------------------------------------------------------------------------------------------------------------------------------------------------------------------------------------------------------------------------------------------------------------------------------------------------------------------------------------------------------------------------------------------------------------------------------------------------------------------------------------------------------------------------------------------------------------------------------------------------------------|----------------------------------------|
|  |                                     | <p>#30 (Comoros):ti,ab OR (Congo):ti,ab OR ("Cook Islands"):ti,ab OR (Costa NEXT Rica*):ti,ab OR ("Cote d'Ivoire"):ti,ab<br/> #31 ("Ivory Coast"):ti,ab OR (Cuba):ti,ab OR (Cuban):ti,ab OR (Djibouti):ti,ab OR (Dominica*):ti,ab<br/> #32 (Ecuador):ti,ab OR (Egypt):ti,ab OR (El NEXT Salvador*):ti,ab OR (Eritrea*):ti,ab OR (Ethiopia*):ti,ab<br/> #33 (Fiji*):ti,ab OR (Gabon*):ti,ab OR (Gambia*):ti,ab OR (Georgia*):ti,ab<br/> #34 (Ghana*):ti,ab OR (Grenada*):ti,ab OR (Guadeloupe):ti,ab OR (Guatemala*):ti,ab<br/> #35 (Guinea*):ti,ab OR (Guyan*):ti,ab OR (Haiti*):ti,ab OR (Hondura*):ti,ab OR (India):ti,ab<br/> #36 (Indian*):ti,ab OR (Indonesia*):ti,ab OR (Iran*):ti,ab OR (Iraq*):ti,ab OR (Jamaica*):ti,ab<br/> #37 (Jordan*):ti,ab OR (Kazakh*):ti,ab OR (Kenya*):ti,ab OR (Kiribati):ti,ab OR ("People's Republic of Korea"):ti,ab<br/> #38 ("North Korea"):ti,ab OR (Kosovo):ti,ab OR (Kosovar*):ti,ab OR (Kyrgyz*):ti,ab OR (Lao):ti,ab<br/> #39 (Laos):ti,ab OR (Laotian*):ti,ab OR (Lebanon):ti,ab OR (Lebanes*):ti,ab OR (Lesotho):ti,ab<br/> #40 (Liberia*):ti,ab OR (Libya*):ti,ab OR (Macedonia*):ti,ab OR (Madagascar*):ti,ab OR (Malawi*):ti,ab<br/> #41 (Malaysia*):ti,ab OR (Maldives):ti,ab OR (Mali):ti,ab OR (Marshall NEXT Island*):ti,ab<br/> #42 [mh Mexico] OR Mexico:ti,ab OR (Mexican*):ti,ab<br/> #43 (Micronesia*):ti,ab OR (Moldova*):ti,ab OR (Mongolia*):ti,ab OR (Montenegr*):ti,ab OR (Morocc*):ti,ab<br/> #44 (Mozambique):ti,ab OR (Myanmar):ti,ab OR (Burmese*):ti,ab OR (Burma):ti,ab OR (Namibia*):ti,ab<br/> #45 Nepal*:ti,ab OR Nicaragua*:ti,ab OR Niger*:ti,ab OR Pakistan*:ti,ab OR Paraguay*:ti,ab<br/> #46 Peru*:ti,ab OR Philippin*:ti,ab OR Rwanda*:ti,ab OR "Sao Tome":ti,ab OR Principe:ti,ab OR Senegal*:ti,ab OR<br/> Serbia*:ti,ab<br/> #47 (Sierra NEXT Leone*):ti,ab OR (Solomon NEXT Island*):ti,ab OR Somalia*:ti,ab OR (South NEXT Africa*):ti,ab OR<br/> "Sri Lanka":ti,ab<br/> #48 "St Lucia":ti,ab OR "Saint Lucia":ti,ab OR "St Vincent":ti,ab OR "Saint Vincent":ti,ab OR Grenad*:ti,ab<br/> #49 Sudan*:ti,ab OR Suriname*:ti,ab OR Swaziland*:ti,ab OR Eswatini*:ti,ab OR Syria*:ti,ab OR Tajik*:ti,ab OR<br/> Tanzania*:ti,ab<br/> #50 Zanzibar:ti,ab OR Thai*:ti,ab OR Timor*:ti,ab OR Togo*:ti,ab OR Tonga*:ti,ab OR Tunisia*:ti,ab<br/> #51 Turkey:ti,ab OR Turkish:ti,ab OR Turkmen*:ti,ab OR Tuvalu*:ti,ab OR Uganda*:ti,ab OR Ukrain*:ti,ab<br/> #52 Uzbeki*:ti,ab OR Vanuatu*:ti,ab OR Venezuela*:ti,ab OR Vietnam*:ti,ab OR Viet nam*:ti,ab<br/> #53 Palestin*:ti,ab OR Yemen*:ti,ab OR Zambia*:ti,ab OR Zimbabw*:ti,ab OR "Western Sahara":ti,ab<br/> #54 Argentin*:ti,ab OR Russia*:ti,ab OR Maurit*:ti,ab OR Palau:ti,ab OR Romania*:ti,ab<br/> #55 {OR #24-#54}</p> |                                        |
|  | <b>#1 AND # 2 AND #3<br/>AND #4</b> | <b>(#3 OR #6 OR #10) AND #20 AND #23 AND #55</b>                                                                                                                                                                                                                                                                                                                                                                                                                                                                                                                                                                                                                                                                                                                                                                                                                                                                                                                                                                                                                                                                                                                                                                                                                                                                                                                                                                                                                                                                                                                                                                                                                                                                                                                                                                                                                                                                                                                                                                                                                                                                                                                                                                                                                                                                                                                                                                                                                                                                                                                                                                                                                                                                                                                   | <b>1,504<br/>1,504<br/>(2000-2023)</b> |

Supplementary File 2. Sample of extraction form

| Publication details |       |                 |                              |              |                      |                      |                |
|---------------------|-------|-----------------|------------------------------|--------------|----------------------|----------------------|----------------|
| Sr. No              | Title | Journal/ source | Calendar year of publication | first author | corresponding author | contact author email | funding agency |
|                     |       |                 |                              |              |                      |                      |                |
|                     |       |                 |                              |              |                      |                      |                |

| Study Methods          |         |            |              |                                                             |             |                    |                    |                  |
|------------------------|---------|------------|--------------|-------------------------------------------------------------|-------------|--------------------|--------------------|------------------|
| Calendar year of study | Country | Study type | Study design | Target population (age, gender, socioeconomic status, etc.) | Sample size | Inclusion criteria | Exclusion criteria | Analysis methods |
|                        |         |            |              |                                                             |             |                    |                    |                  |
|                        |         |            |              |                                                             |             |                    |                    |                  |

| Intervention      |                        |                          |                           |                     |                                     |                                                   |                                 |                              |                                                         |                       |                            |
|-------------------|------------------------|--------------------------|---------------------------|---------------------|-------------------------------------|---------------------------------------------------|---------------------------------|------------------------------|---------------------------------------------------------|-----------------------|----------------------------|
| Intervention name | Timing of intervention | Duration of intervention | Guiding theory/ framework | Intervention topics | Intervention components/ activities | Frequency and duration of intervention activities | Intervention delivery mechanism | Intervention delivery agents | Selection, training, and supervision of delivery agents | Intervention coverage | Control group intervention |
|                   |                        |                          |                           |                     |                                     |                                                   |                                 |                              |                                                         |                       |                            |
|                   |                        |                          |                           |                     |                                     |                                                   |                                 |                              |                                                         |                       |                            |

| Outcome   |                                    |                                  |                                     |           |                                    |                                  |                                     |
|-----------|------------------------------------|----------------------------------|-------------------------------------|-----------|------------------------------------|----------------------------------|-------------------------------------|
| Outcome 1 | Timepoint for Outcome 1 assessment | Outcome 1 Methods of measurement | Outcome 1 measure (units and tools) | Outcome X | Timepoint for outcome X assessment | Outcome X methods of measurement | Outcome X measure (units and tools) |
|           |                                    |                                  |                                     |           |                                    |                                  |                                     |
|           |                                    |                                  |                                     |           |                                    |                                  |                                     |

**Results**

| Quantitative findings | Qualitative findings | Theory to explain the success | Theory to explain the failure |
|-----------------------|----------------------|-------------------------------|-------------------------------|
|                       |                      |                               |                               |
|                       |                      |                               |                               |

For peer review only

1  
2  
3  
4  
5  
6  
7  
8  
9  
10  
11  
12  
13  
14  
15  
16  
17  
18  
19  
20  
21  
22  
23  
24  
25  
26  
27  
28  
29  
30  
31  
32  
33  
34  
35  
36  
37  
38  
39  
40  
41  
42  
43  
44  
45  
46

**PRISMA-P (Preferred Reporting Items for Systematic review and Meta-Analysis Protocols) 2015 checklist: recommended items to address in a systematic review protocol\***

| Section and topic                 | Item No | Checklist item                                                                                                                                                                                                                                                                                                                                                                                                                                                                                                                                                                               |
|-----------------------------------|---------|----------------------------------------------------------------------------------------------------------------------------------------------------------------------------------------------------------------------------------------------------------------------------------------------------------------------------------------------------------------------------------------------------------------------------------------------------------------------------------------------------------------------------------------------------------------------------------------------|
| <b>ADMINISTRATIVE INFORMATION</b> |         |                                                                                                                                                                                                                                                                                                                                                                                                                                                                                                                                                                                              |
| Title:                            |         |                                                                                                                                                                                                                                                                                                                                                                                                                                                                                                                                                                                              |
| Identification                    | 1a      | Identify the report as a protocol of a systematic review<br><a href="#">Title, p1</a> : “Community-based interventions targeting multiple forms of malnutrition among adolescents in low- and middle-income countries: protocol for a scoping review”                                                                                                                                                                                                                                                                                                                                        |
| Update                            | 1b      | If the protocol is for an update of a previous systematic review, identify as such<br>NA                                                                                                                                                                                                                                                                                                                                                                                                                                                                                                     |
| Registration                      | 2       | If registered, provide the name of the registry (such as PROSPERO) and registration number<br><a href="#">Abstract, p4</a> : “The final protocol was registered prospectively with the Open Science Framework on July 19, 2023 ( <a href="https://osf.io/t2d78">https://osf.io/t2d78</a> ).”                                                                                                                                                                                                                                                                                                 |
| Authors:                          |         |                                                                                                                                                                                                                                                                                                                                                                                                                                                                                                                                                                                              |
| Contact                           | 3a      | Provide name, institutional affiliation, e-mail address of all protocol authors; provide physical mailing address of corresponding author<br>Please see title pages, page 1-3                                                                                                                                                                                                                                                                                                                                                                                                                |
| Contributions                     | 3b      | Describe contributions of protocol authors and identify the guarantor of the review<br><a href="#">Page 15</a> : “ <b>Author Contributors</b><br>SS conceived the idea, developed the methods, and wrote the first draft of the manuscript. ALK, MR, and UP contributed to the methods and supported the drafting and editing of the manuscript. ALK and MR contributed meaningfully to the design of the search strategy. SO, NM, DOA, CN, SL, TB, WWF, and ARISE-NUTRINT study collaborators supervised and reviewed the protocol. All authors revised and approved the final manuscript.” |
| Amendments                        | 4       | If the protocol represents an amendment of a previously completed or published protocol, identify as such and list changes; otherwise, state plan for documenting important protocol amendments<br>NA                                                                                                                                                                                                                                                                                                                                                                                        |
| Support:                          |         |                                                                                                                                                                                                                                                                                                                                                                                                                                                                                                                                                                                              |
| Sources                           | 5a      | Indicate sources of financial or other support for the review<br><a href="#">Page 16</a> : “ <b>Funding</b><br>This study was funded by the European Union Horizon 2022. Views and opinions expressed are however those of the author(s) only and do not necessarily reflect those of the European Union. Neither the European Union nor the granting authority can be held responsible for them.”                                                                                                                                                                                           |



|                           |    |                                                                                                                                                                                                                                                                                                                                                                                                                                                                                                                                                                                                                                                                                                                                                                                                                                                                                         |
|---------------------------|----|-----------------------------------------------------------------------------------------------------------------------------------------------------------------------------------------------------------------------------------------------------------------------------------------------------------------------------------------------------------------------------------------------------------------------------------------------------------------------------------------------------------------------------------------------------------------------------------------------------------------------------------------------------------------------------------------------------------------------------------------------------------------------------------------------------------------------------------------------------------------------------------------|
| Sponsor                   | 5b | Provide name for the review funder and/or sponsor<br><a href="#">Page 16: “Funding</a><br>This study was funded by the European Union Horizon 2022. Views and opinions expressed are however those of the author(s) only and do not necessarily reflect those of the European Union. Neither the European Union nor the granting authority can be held responsible for them.”                                                                                                                                                                                                                                                                                                                                                                                                                                                                                                           |
| Role of sponsor or funder | 5c | Describe roles of funder(s), sponsor(s), and/or institution(s), if any, in developing the protocol<br><a href="#">Page 16: “Funding</a><br>This study was funded by the European Union Horizon 2022. Views and opinions expressed are however those of the author(s) only and do not necessarily reflect those of the European Union. Neither the European Union nor the granting authority can be held responsible for them.”                                                                                                                                                                                                                                                                                                                                                                                                                                                          |
| <b>INTRODUCTION</b>       |    |                                                                                                                                                                                                                                                                                                                                                                                                                                                                                                                                                                                                                                                                                                                                                                                                                                                                                         |
| Rationale                 | 6  | Describe the rationale for the review in the context of what is already known<br><a href="#">Please see the Introduction, pages 6-8.</a>                                                                                                                                                                                                                                                                                                                                                                                                                                                                                                                                                                                                                                                                                                                                                |
| Objectives                | 7  | Provide an explicit statement of the question(s) the review will address with reference to participants, interventions, comparators, and outcomes (PICO)<br><a href="#">Page 8:</a><br>“The purpose of this scoping review is to comprehensively review the literature to describe community-based interventions that address the multiple forms of malnutrition such as obesity, overweight, underweight, wasting, stunting, anemia, and micronutrient deficiencies affecting adolescents in LMICs and describe the effects of these interventions on nutrition and health.”                                                                                                                                                                                                                                                                                                           |
| <b>METHODS</b>            |    |                                                                                                                                                                                                                                                                                                                                                                                                                                                                                                                                                                                                                                                                                                                                                                                                                                                                                         |
| Eligibility criteria      | 8  | Specify the study characteristics (such as PICO, study design, setting, time frame) and report characteristics (such as years considered, language, publication status) to be used as criteria for eligibility for the review<br><a href="#">Pages 9-12:</a><br><a href="#">Please see Table 1 and section “Eligibility”</a>                                                                                                                                                                                                                                                                                                                                                                                                                                                                                                                                                            |
| Information sources       | 9  | Describe all intended information sources (such as electronic databases, contact with study authors, trial registers or other grey literature sources) with planned dates of coverage<br><a href="#">Pages 8-9: “Data sources, search terms and search strategy</a><br>As part of our primary strategy, we will search MEDLINE (through PubMed), Embase, and CENTRAL (through the Cochrane Library). All databases will be searched for eligible studies from January 1, 2000, through July 14, 2023. We will identify potentially relevant published studies using the combination of medical subject headings (MeSH) and text words denoting nutrition-specific and nutrition-sensitive interventions. We will also examine references and bibliographies of included studies to identify additional sources of information. This search of studies will be supplemented by reviewing |

1  
2  
3  
4  
5  
6  
7  
8  
9  
10  
11  
12  
13  
14  
15  
16  
17  
18  
19  
20  
21  
22  
23  
24  
25  
26  
27  
28  
29  
30  
31  
32  
33  
34  
35  
36  
37  
38  
39  
40  
41  
42  
43  
44  
45  
46

---

ClinicalTrials.gov and organizational websites such as the World Health Organization (WHO), World Bank, United Nations Children’s Fund (UNICEF), and United Nations Population Fund (UNFPA). When possible, reports written in languages other than English will be translated by colleagues who are native speakers of those languages. No study will be considered if it cannot be adequately translated.”

---

Search strategy 10 Present draft of search strategy to be used for at least one electronic database, including planned limits, such that it could be repeated  
Please see Supplementary File 1

---

Study records:

Data management 11a Describe the mechanism(s) that will be used to manage records and data throughout the review  
Page 12: “Data management  
The records will be imported into Covidence (Veritas Health Innovation, Melbourne, Australia), an Internet-based systematic review management program. Detection and removal of duplicates, title and abstract screening, and full-text screening will be performed by Covidence.”

Selection process 11b State the process that will be used for selecting studies (such as two independent reviewers) through each phase of the review (that is, screening, eligibility and inclusion in meta-analysis)  
Page 12: “Selection of studies  
Using Covidence, we will screen titles, abstracts, and full texts. First, two reviewers will independently assess all search results (i.e., titles and abstracts) and exclude irrelevant studies based on inclusion and exclusion criteria. Next, two reviewers will carry out the full-text screening based on the same inclusion/exclusion criteria. The reviewers will discuss and resolve any difference of opinion or, if necessary, seek a third reviewer's opinion for resolving differences. A study flow diagram stating the specific reasons for exclusion will be maintained following the PRISMA for Scoping Review statement (PRISMA-ScR).”

Data collection process 11c Describe planned method of extracting data from reports (such as piloting forms, done independently, in duplicate), any processes for obtaining and confirming data from investigators  
Pages 13: “Data extraction  
Two reviewers will independently extract and enter data from studies included in the review. We will develop and test an extraction form on five randomly selected studies. We will extract the following information.

- Study details including the title, authors (first author and corresponding author), the corresponding author's contact information, journal (or source for unpublished reports), calendar year of publication, calendar year of intervention, country, and source of funding.
- Study methods including objectives and/or research questions, type of study, investigation strategies, settings, sample size, and sample characteristics (e.g., age, sex, socioeconomic status)
- Intervention strategy including target population, delivery platform and providers (including selection, training, supervision, support, and incentivization), types of nutrition and other interventions (including content, conceptual framework and/or theoretical underpinnings, timing, duration, and dosage or frequency),

and comparator/control.

- Outcomes assessed and details of the measures used.
- Findings including the coverage of services, facilitators and barriers to intervention delivery and uptake, effectiveness findings with point estimates and measures of variance (standard errors, 95% confidence intervals, or *p*-values), and any other key findings related to the scoping review questions.

We will contact the corresponding author via email if there is missing or inconsistent information. We will contact the author two times at most. The available data will be analyzed and any gaps due to missing data will be discussed if the data issue cannot be resolved after contacting the authors.”

Data items

12 List and define all variables for which data will be sought (such as PICO items, funding sources), any pre-planned data assumptions and simplifications

**Pages 13: “Data extraction**

Two reviewers will independently extract and enter data from studies included in the review. We will develop and test an extraction form on five randomly selected studies. We will extract the following information.

- Study details including the title, authors (first author and corresponding author), the corresponding author's contact information, journal (or source for unpublished reports), calendar year of publication, calendar year of intervention, country, and source of funding.
- Study methods including objectives and/or research questions, type of study, investigation strategies, settings, sample size, and sample characteristics (e.g., age, sex, socioeconomic status)
- Intervention strategy including target population, delivery platform and providers (including selection, training, supervision, support, and incentivization), types of nutrition and other interventions (including content, conceptual framework and/or theoretical underpinnings, timing, duration, and dosage or frequency), and comparator/control.
- Outcomes assessed and details of the measures used.
- Findings including the coverage of services, facilitators and barriers to intervention delivery and uptake, effectiveness findings with point estimates and measures of variance (standard errors, 95% confidence intervals, or *p*-values), and any other key findings related to the scoping review questions.

We will contact the corresponding author via email if there is missing or inconsistent information. We will contact the author two times at most. The available data will be analyzed and any gaps due to missing data will be discussed if the data issue cannot be resolved after contacting the authors.”

|                                    |    |                                                                                                                                                                             |
|------------------------------------|----|-----------------------------------------------------------------------------------------------------------------------------------------------------------------------------|
| Outcomes and prioritization        | 13 | List and define all outcomes for which data will be sought, including prioritization of main and additional outcomes, with rationale<br><a href="#">NA – Scoping Review</a> |
| Risk of bias in individual studies | 14 | Describe anticipated methods for assessing risk of bias of individual studies, including whether this will be done at the                                                   |

outcome or study level, or both; state how this information will be used in data synthesis

**Page 13-14: “Risk of bias assessment**

As scoping reviews are exploratory in nature, risk of bias assessments are not typically required as part of the guidelines for scoping reviews [cite: <https://bmcmmedresmethodol.biomedcentral.com/articles/10.1186/s12874-018-0611-x>]. However, we plan to assess the risk of bias among studies with an available quantitative measure as a preliminary way of contextualising the reported measures of impact on the outcomes reported. For the assessment of the risk of bias in the selected studies, we will use the Cochrane Collaboration’s revised tool for assessing the risk of bias in randomized trials (RoB 2). Two reviewers will independently evaluate methodological quality. Any uncertainties or disagreements will be resolved by discussion or by a third reviewer, whenever needed. The tool is a domain-based evaluation, in which critical assessments for risk of bias are made separately for various domains, including the randomization process, deviation from intended interventions, missing outcome data, measurement of the outcome, and selective outcome reporting. The risk of bias in clustered trials will be similarly assessed using the risk of bias 2 for cluster-randomized trials (RoB 2 CRT). Additionally, we will use the Risk of Bias in Non-randomized Studies of Interventions (ROBINS-I) tool, to assess the risk of bias for controlled before-after studies and non-randomized controlled trials.”

|    |                |     |                                                                                                                                                                                                                                                                                                                                                                                                                                                                                                                                                                                                                                                                                                                                                                                                                                                                                                                                                                                                                                                                                                                                                                                                                                                                                                                                                                                                                                                                                                                      |
|----|----------------|-----|----------------------------------------------------------------------------------------------------------------------------------------------------------------------------------------------------------------------------------------------------------------------------------------------------------------------------------------------------------------------------------------------------------------------------------------------------------------------------------------------------------------------------------------------------------------------------------------------------------------------------------------------------------------------------------------------------------------------------------------------------------------------------------------------------------------------------------------------------------------------------------------------------------------------------------------------------------------------------------------------------------------------------------------------------------------------------------------------------------------------------------------------------------------------------------------------------------------------------------------------------------------------------------------------------------------------------------------------------------------------------------------------------------------------------------------------------------------------------------------------------------------------|
| 18 | Data synthesis | 15a | Describe criteria under which study data will be quantitatively synthesised<br><a href="#">NA – Scoping review</a>                                                                                                                                                                                                                                                                                                                                                                                                                                                                                                                                                                                                                                                                                                                                                                                                                                                                                                                                                                                                                                                                                                                                                                                                                                                                                                                                                                                                   |
| 19 |                | 15b | If data are appropriate for quantitative synthesis, describe planned summary measures, methods of handling data and methods of combining data from studies, including any planned exploration of consistency (such as $I^2$ , Kendall’s $\tau$ )<br><a href="#">NA – Scoping review</a>                                                                                                                                                                                                                                                                                                                                                                                                                                                                                                                                                                                                                                                                                                                                                                                                                                                                                                                                                                                                                                                                                                                                                                                                                              |
| 20 |                | 15c | Describe any proposed additional analyses (such as sensitivity or subgroup analyses, meta-regression)<br><a href="#">NA – Scoping review</a>                                                                                                                                                                                                                                                                                                                                                                                                                                                                                                                                                                                                                                                                                                                                                                                                                                                                                                                                                                                                                                                                                                                                                                                                                                                                                                                                                                         |
| 21 |                | 15d | If quantitative synthesis is not appropriate, describe the type of summary planned<br><b>Pages 14-15: “Synthesis of evidence</b>                                                                                                                                                                                                                                                                                                                                                                                                                                                                                                                                                                                                                                                                                                                                                                                                                                                                                                                                                                                                                                                                                                                                                                                                                                                                                                                                                                                     |
| 22 |                |     | All included studies will be systematically synthesized in the text and a table following the SWiM guidelines (Synthesis Without Meta-analysis). In this synthesis, we will describe how many sources of evidence were screened, assessed for eligibility, and included in the review, along with reasons for exclusion at each stage. Our presentation of included sources of evidence will include summary characteristics and citations, as well as a critical appraisal, if applicable. Studies will be grouped based on methods and interventions, standardized outcomes metrics, synthesis methods, criteria used to prioritize results for summary, reporting of results, the certainty of results, heterogeneity in effects, as well as barriers and facilitators to delivering the interventions will be discussed. For continuous outcomes, effect estimates will be expressed as mean differences (with 95% confidence intervals) between the intervention group and the control group; for dichotomous outcomes, effect estimates will be expressed as risk ratios, rate ratios, hazard ratios, or odds ratios (all with a 95% confidence interval). Additionally, we will discuss the limitations of the review process and provide an interpretation of the results concerning the objectives of the review, as well as possible implications or next steps. We will follow the PRISMA Extension for Scoping Reviews (PRISMA-ScR) checklist and guidelines to ensure a robust and replicable process.” |

|                                   |    |                                                                                                                                                                      |
|-----------------------------------|----|----------------------------------------------------------------------------------------------------------------------------------------------------------------------|
| Meta-bias(es)                     | 16 | Specify any planned assessment of meta-bias(es) (such as publication bias across studies, selective reporting within studies)<br><a href="#">NA – Scoping Review</a> |
| Confidence in cumulative evidence | 17 | Describe how the strength of the body of evidence will be assessed (such as GRADE)<br><a href="#">NA – Scoping Review</a>                                            |

**\* It is strongly recommended that this checklist be read in conjunction with the PRISMA-P Explanation and Elaboration (cite when available) for important clarification on the items. Amendments to a review protocol should be tracked and dated. The copyright for PRISMA-P (including checklist) is held by the PRISMA-P Group and is distributed under a Creative Commons Attribution Licence 4.0.**

*From: Shamseer L, Moher D, Clarke M, Ghersi D, Liberati A, Petticrew M, Shekelle P, Stewart L, PRISMA-P Group. Preferred reporting items for systematic review and meta-analysis protocols (PRISMA-P) 2015: elaboration and explanation. BMJ. 2015 Jan 2;349(jan02 1):g7647.*
